# Supplementary material
Source: PubMed Central journal article supplement (PMC8357352)
Supplement: NIHMS1721187-supplement-Supplementary_files.pdf [file NIHMS1721187-supplement-Supplementary_files.pdf]

## **CONCERT-HF On-line Supplement Table of Contents**

CONCERT-HF Stage 1 Summary Report

Supplemental Table 1. Inclusion and Exclusion Criteria

Supplemental Table 2. Summary of Manufactured Products

Supplemental Table 3. Advanced Characterization of C-Kit Positive Cardiac Cell (CPC) Products

Supplemental Table 4. Patients with Events by System Organ Class and Treatment Group

Supplemental Table 5. Patients with MACE and Other Significant Clinical Events by Treatment Group (As Treated)

Supplemental Table 6. Endpoint Analysis for Baseline to 6 Month (Intention to Treat)

Supplemental Table 7. Endpoint Analysis for Baseline to 12 Month (Intention to Treat)

Supplemental Table 8. Trajectory Assessment (Intention To Treat)

Supplemental Table 9. Trajectory Assessment (As Treated)

Supplemental Table 10. Endpoint Analysis for Baseline to 6 Month (As Treated)

Supplemental Table 11. Endpoint Analysis for Baseline to 12 Month (As Treated)

## **CONCERT-HF Stage 1 Summary Report**

The CONCERT-HF protocol was conducted in two stages; an open label lead-in investigation (Stage 1) followed by a randomized controlled trial (Stage 2). The open label lead-in investigation consisted of 18 subjects randomized 1:1 to either a standard of care (SOC) control group (i.e., subjects did not undergo harvest, mapping, or injection procedures) or to the combination cell therapy group (mesenchymal stromal cells [MSCs] + c-kit positive cardiac cells [CPCs]). All subjects were followed for 3 months to complete safety and functional assessments. The resulting three-month data were reviewed by the NHLBI's Gene and Cell Therapy Data and Safety Monitoring Board (DSMB) prior to initiation of Stage 2 (n=125).

### ***Enrollment***

The first participant was enrolled on October 31, 2015. Twenty-seven participants were consented/enrolled in the CONCERT-HF Lead-in, and 18 successfully completed baseline testing and randomization, 9 to MSCs+CPCs therapy and 9 to SOC. Successful harvest procedures took place in 6 of the 9 treated participants; one participant suffered a stroke prior to harvest (reported to the DSMB in January 2016); one participant died from complications during the endomyocardial biopsy (EMB) procedure (reviewed on teleconference with DSMB in April 2016), and one participant's harvest procedures were cancelled because they were scheduled after the DSMB placed a hold on EMB procedures. Of the remaining 6 treated participants, 5 had successful growth of both cell types and successful study product injection by NOGA; one failed to meet the release criteria for minimum dose of CPCs and thus did not get study product injection. Of the nine participants randomized to SOC, one withdrew consent and one received an LVAD before the three-month endpoint. Thus, 8 SOC and 5 MSCs+CPCs participants were followed for the endpoints of CONCERT-HF lead-in. A full report of the Lead-in Phase (Stage 1) data was submitted to the DSMB on November 7, 2016 and subsequently forwarded to the Food and Drug Administration under our IND 16399. The final Stage 1 follow-up study visits were completed in July 2017. Final adverse event reporting concluded at the September 2017 DSMB meeting.

### ***Baseline Characteristics***

Eighteen participants were randomized during the lead-in phase, 9 to MSCs+CPCs therapy and 9 to SOC. No statistically significant differences were seen in baseline characteristics between the treated and SOC groups. The 9 participants randomized to the MSCs+CPCs group had an average age of 62 years, weight 92.5 kg, BMI 31, and blood pressure (BP) 120/71 mmHg; the 9 participants in the SOC group had an average age of 57 years, weight 97.1 kg, BMI 33, and BP 114/67 mmHg. Though also not statistically significant, 4 participants in the SOC group had previous hospitalizations compared with none in the treated group (p=0.082); 6 participants in the treated group had a history of diabetes compared with 3 in the SOC group (p=0.347); and 7 participants in the treated group were on ACE inhibitors compared with 2 in the SOC group (p=0.057). In addition, 7 participants in each group had an implantable cardiac device.

### ***Adverse events***

The tables below are provided for reference. There were 12 adverse events (AEs), of which nine were serious and reported to the DSMB.

### Serious Adverse Events

| Subject ID | Acrostic | Date of Treatment (SPI) | Date of SAE | Description (MedDRA preferred terms) | Expectedness | Severity or Grade                       | Relationship to Study Product | Relationship to Study Procedure | Outcome                                 |
|------------|----------|-------------------------|-------------|--------------------------------------|--------------|-----------------------------------------|-------------------------------|---------------------------------|-----------------------------------------|
| 03-5002-03 | FREJO    | No SPI                  | 12/8/2015   | Haemorrhagic transformation stroke   | Expected     | Grade 3 - Severe                        | Unrelated                     | Not related to study procedure  | Resolved or stabilized with sequelae    |
| 03-5002-03 | FREJO    | No SPI                  | 12/8/2015   | Acute myocardial infarction          | Expected     | Grade 3 - Severe                        | Unrelated                     | Not related to study procedure  | Resolved or stabilized with sequelae    |
| 02-5003-02 | JAMARR   | No SPI                  | 3/31/2016   | Cardiac perforation                  | Expected*    | Grade 5 - Death                         | Definitely related            | Endomyocardial Biopsy Harvest   | Death: death due to AE                  |
| 07-5040-07 | SALMI    | No SPI                  | 4/18/2016   | Cardiac failure                      | Expected     | Grade 3 - Severe                        | Unrelated                     | Not related to study procedure  | Resolved or stabilized without sequelae |
| 07-5040-07 | SALMI    | No SPI                  | 5/9/2016    | Cardiac failure congestive           | Expected     | Grade 3 - Severe                        | Unrelated                     | Not related to study procedure  | Resolved or stabilized with sequelae    |
| 03-5021-03 | PARSH    | No SPI                  | 4/13/2016   | Cardiac failure congestive           | Expected     | Grade 3 - Severe                        | Unrelated                     | Not related to study procedure  | Resolved or stabilized without sequelae |
| 03-5021-03 | PARSH    | No SPI                  | 4/13/2016   | Intracardiac thrombus                | Expected     | Grade 3 - Severe                        | Unrelated                     | Not related to study procedure  | Resolved or stabilized without sequelae |
| 07-5040-07 | SALMI    | No SPI                  | 5/17/2016   | Cardiac failure congestive           | Expected     | Grade 4 - Life Threatening or Disabling | Unrelated                     | Not related to study procedure  | Resolved or stabilized with sequelae    |
| 07-5040-07 | SALMI    | No SPI                  | 6/20/2016   | Cardiac failure congestive           | Expected     | Grade 4 - Life Threatening or Disabling | Unrelated                     | Not related to study procedure  | Resolved or stabilized with sequelae    |

\* Per the FDA, similar events (should they occur in the future) would best be characterized as unexpected

### Other adverse events

| Subject ID | Acrostic | Date of Treatment (SPI) | Date of AE | Description (MedDRA preferred terms) | Expectedness | Severity or Grade  | Relationship to Study Product | Relationship to Study Procedure | Outcome                                 |
|------------|----------|-------------------------|------------|--------------------------------------|--------------|--------------------|-------------------------------|---------------------------------|-----------------------------------------|
| 03-5006-03 | GALRI    | No SPI                  | 4/1/2016   | Cardiac failure acute                | Expected     | Grade 2 - Moderate | Unrelated                     | Not related to study procedure  | Resolved or stabilized without sequelae |
| 07-5042-07 | MARSTJ   | No SPI                  | 6/18/2016  | Epistaxis                            | Unexpected   | Grade 2 - Moderate | Unrelated                     | Not related to study procedure  | Resolved or stabilized without sequelae |
| 07-5002-07 | SALPAF   | 6/23/2016               | 6/23/2016  | Abdominal pain                       | Expected     | Grade 2 - Moderate | Unlikely                      | Study Product Injection         | Resolved or stabilized without sequelae |

There were no events attributed to the SPI, and total events reported do not differ significantly between the two groups for either the SAEs or AEs. In summary, the safety profile surrounding the SPI is excellent, and the Network accepted the guidance of the DSMB to eliminate the biopsy for the untreated participants in the placebo and MSCs only groups.

### LV Function and Functional Status

The table below includes measures assessed at baseline and 3 months post treatment to explore changes over time in those receiving the MSCs + CPCs (Combo) versus those receiving SOC.

Of the nine patients randomized to the MSCs + CPCs group, four were excluded from the primary analysis (one withdrew due to an SAE prior to harvest, one died, one harvest was canceled due to DSMB hold, and one was unable to get the Month 3 data due to a weather event); also the subject whose cells failed to grow did not have the Month 3 MRI or CPET exams. Of the nine patients randomized to the SOC group, one withdrew consent and was excluded from the primary analysis; also one subject received an LVAD and did not receive the Month 3 MRI, CPET or 6MWT.

### LV Function and Functional Status

|                                  | MSCs+CPCs (Combo)<br>[N] mean (SD) {median} | SOC<br>[N] mean (SD) {median} | Effect Estimate<br>Diff (SE) [95%CI] P(t-test): P(Wilcoxon) |
|----------------------------------|---------------------------------------------|-------------------------------|-------------------------------------------------------------|
| <b>Function</b>                  |                                             |                               |                                                             |
| <b>LVEF</b>                      |                                             |                               |                                                             |
| Baseline                         | [4] 27.4 ( 5.7) { 26 }                      | [7] 31.8 ( 7 ) { 31.9 }       |                                                             |
| Three Month                      | [4] 29.3 ( 5.4) { 29 }                      | [7] 32.7 ( 7.4) { 32.7 }      |                                                             |
| Delta                            | [4] 1.9 ( 3.5) { 1.5 }                      | [7] 0.9 ( 1.9) { 0.4 }        | 1 ( 1.6) [-4.3, 6.2] 0.638: 0.571                           |
| Within Group P-value             | 0.375                                       | 0.328                         |                                                             |
| <b>Structure</b>                 |                                             |                               |                                                             |
| <b>LVEDV</b>                     |                                             |                               |                                                             |
| Baseline                         | [4] 229.6 ( 45.4) { 228 }                   | [7] 281.8 ( 91.9) { 283.3 }   |                                                             |
| Three Month                      | [4] 245.5 ( 40.7) { 234.1 }                 | [7] 275.8 ( 83.6) { 266.1 }   |                                                             |
| Delta                            | [4] 15.9 ( 14.8) { 19.7 }                   | [7] -6 ( 18.9) { 0.9 }        | 22 ( 11.1) [-1.9, 45.8] 0.066: 0.059                        |
| Within Group P-value             | 0.25                                        | 0.812                         |                                                             |
| <b>LVESV</b>                     |                                             |                               |                                                             |
| Baseline                         | [4] 167.7 ( 41.5) { 168 }                   | [7] 196.8 ( 79.6) { 191.1 }   |                                                             |
| Three Month                      | [4] 174 ( 36) { 163.8 }                     | [7] 189.9 ( 75.4) { 167.2 }   |                                                             |
| Delta                            | [4] 6.3 ( 18.4) { 10.9 }                    | [7] -6.9 ( 10.8) { -0.8 }     | 13.2 ( 8.6) [-14.2, 40.5] 0.258: 0.089                      |
| Within Group P-value             | 0.625                                       | 0.219                         |                                                             |
| <b>LVEDVI</b>                    |                                             |                               |                                                             |
| Baseline                         | [4] 112 ( 23.9) { 108.5 }                   | [7] 125.5 ( 29.9) { 132 }     |                                                             |
| Three Month                      | [4] 118.3 ( 21.4) { 111.7 }                 | [7] 122.5 ( 26.8) { 122.7 }   |                                                             |
| Delta                            | [4] 6.3 ( 7.7) { 7.9 }                      | [7] -3 ( 9.6) { -1.5 }        | 9.3 ( 5.6) [-2.9, 21.5] 0.117: 0.131                        |
| Within Group P-value             | 0.25                                        | 0.469                         |                                                             |
| <b>LVESVI</b>                    |                                             |                               |                                                             |
| Baseline                         | [4] 82.1 ( 22.5) { 80.2 }                   | [7] 87.2 ( 28.3) { 91.7 }     |                                                             |
| Three Month                      | [4] 84.2 ( 20.3) { 78.7 }                   | [7] 83.9 ( 27) { 84.7 }       |                                                             |
| Delta                            | [4] 2.1 ( 9) { 4 }                          | [7] -3.3 ( 5.4) { -0.5 }      | 5.4 ( 4.3) [-8, 18.9] 0.331: 0.186                          |
| Within Group P-value             | 0.625                                       | 0.297                         |                                                             |
| <b>Functional Capacity</b>       |                                             |                               |                                                             |
| <b>Peak VO2</b>                  |                                             |                               |                                                             |
| Baseline                         | [4] 14.3 ( 4.7) { 14.6 }                    | [7] 16.2 ( 4.2) { 17.3 }      |                                                             |
| Three Month                      | [4] 14 ( 5.9) { 14 }                        | [7] 16.3 ( 3) { 17.1 }        |                                                             |
| Delta                            | [4] -0.3 ( 2) { -0.6 }                      | [7] 0 ( 2.2) { 0.1 }          | -0.3 ( 1.3) [-3.4, 2.7] 0.798: 0.924                        |
| Within Group P-value             | 0.875                                       | 1                             |                                                             |
| <b>Exercise Tolerance (6MWT)</b> |                                             |                               |                                                             |
| Baseline                         | [5] 391.4 ( 81.1) { 353 }                   | [7] 402.6 ( 102.5) { 392 }    |                                                             |
| Three Month                      | [5] 413.8 ( 116.8) { 429 }                  | [7] 422.5 ( 88.3) { 389.5 }   |                                                             |
| Delta                            | [5] 22.4 ( 98.1) { -10 }                    | [7] 19.9 ( 56.4) { 18 }       | 2.5 ( 44.4) [-117.4, 122.4] 0.961: 0.808                    |
| Within Group P-value             | 1                                           | 0.578                         |                                                             |
| <b>MLHFQ</b>                     |                                             |                               |                                                             |
| Baseline                         | [5] 22.5 ( 20.2) { 24 }                     | [8] 49.2 ( 20.5) { 56.5 }     |                                                             |
| Three Month                      | [5] 23.8 ( 18.9) { 15 }                     | [8] 50.9 ( 27.6) { 49.5 }     |                                                             |
| Delta                            | [5] 1.3 ( 12.9) { 0 }                       | [8] 1.6 ( 18.7) { -2.5 }      | -0.3 ( 9.6) [-19.7, 19] 0.97: 0.77                          |
| Within Group P-value             | 0.875                                       | 0.945                         |                                                             |

## Supplemental Table 1. Inclusion and Exclusion Criteria

### Inclusion Criteria

---

To participate, a patient MUST:

- Be  $\geq 21$  and  $< 80$  years of age
  - Have documented coronary artery disease with evidence of myocardial injury, LV dysfunction, and clinical evidence of HF
  - Have a “detectable” area of myocardial injury defined as  $\geq 5\%$  LV involvement (infarct volume) and any subendocardial involvement by cMRI
  - Have an EF  $\leq 40\%$  by cMRI
  - Be receiving guideline-driven medical therapy for heart failure at stable and tolerated doses for  $\geq 1$  month prior to consent
  - Be a candidate for cardiac catheterization
  - Have NYHA class I, II or III heart failure symptoms
  - If a female of childbearing potential, be willing to use one form of birth control for the duration of the study, and undergo a pregnancy test at baseline and within 36 hours prior to injection
- 

### Exclusion Criteria

---

To participate, a patient MUST NOT HAVE:

- Indication for standard-of-care surgery (including valve surgery, placement of LV assist device, or imminent heart transplantation), coronary artery bypass grafting (CABG) procedure, and/or percutaneous coronary intervention (PCI). Candidates cannot be UNOS 1A or 1B, and they must have documented low probability of being transplanted.
- PCI within 3 months of randomization
- CABG within 4 months of randomization
- Valvular heart disease including mechanical or bioprosthetic heart valve, severe valvular (any valve) insufficiency/regurgitation within 12 months of consent, and aortic stenosis with valve area  $\leq 1.5 \text{ cm}^2$
- History of ischemic or hemorrhagic stroke within 90 days of consent
- History of an LV remodeling surgical procedure utilizing prosthetic material
- Presence of a pacemaker and/or ICD generator with any of the following limitations/conditions:
  - manufactured before the year 2000
  - leads implanted  $< 6$  weeks prior to consent
  - non-transvenous epicardial or abandoned leads
  - subcutaneous ICDs
  - leadless pacemakers
  - any other condition that, in the judgment of device-trained staff, would deem an MRI contraindicated
- Pacemaker-dependence with an ICD (pacemaker-dependent candidates without an ICD are not excluded)
- A cardiac resynchronization therapy (CRT) device implanted within 3 months of consent
- Other MRI contraindications (e.g., patient body habitus incompatible with MRI)
- An appropriate ICD firing or anti-tachycardia pacing (ATP) for ventricular fibrillation or ventricular tachycardia within 30 days of consent

- Ventricular tachycardia ( $\geq 20$  consecutive beats) without an ICD within 3 months of consent, or symptomatic Mobitz II or higher degree atrioventricular block without a functioning pacemaker within 3 months of consent
  - Presence of LV thrombus
  - Baseline  $VO_2$  max  $> 75\%$  of age and gender based predictive values
  - Baseline eGFR  $< 35$  ml/min/1.73 m<sup>2</sup>
  - Poorly controlled blood glucose levels (HbA1c  $> 10\%$ )
  - Hematologic abnormality evidenced by hematocrit  $< 25\%$ , white blood cell  $< 2,500$ /ul or platelet count  $< 100,000$ /ul
  - Liver dysfunction evidenced by enzymes (AST and ALT)  $> 3$  times the ULN
  - Coagulopathy (INR  $\geq 1.3$ ) not due to a reversible cause (e.g., warfarin and/or Factor Xa inhibitors). Patients who cannot be withdrawn from anticoagulation will be excluded.
  - HIV and/or active HBV or HCV
  - Allergy to radiographic contrast material that cannot adequately be managed by premedication
  - Known history of anaphylactic reaction to penicillin or streptomycin
  - Received gene or cell-based therapy from any source within the previous 12 months
  - History of malignancy within 5 years, excluding basal cell carcinoma and cervical carcinoma *in situ* which have been definitively treated
  - Condition that limits lifespan to  $< 1$  year
  - History of drug or alcohol abuse
  - Participation in an investigational therapeutic or device trial within 30 days of consent
  - Cognitive or language barriers that prohibit obtaining informed consent or any study elements
  - Pregnancy or lactation or plans to become pregnant in the next 12 months
  - Any other condition that, in the judgment of the Investigator or Sponsor, would impair enrollment, study product administration, or follow-up
-

**Supplemental Table 2. Summary of Manufactured Products**

| Characteristics of Manufactured Products*             | MSC Products (N=41) |      |       | CPC Products (N=48) |      |       |
|-------------------------------------------------------|---------------------|------|-------|---------------------|------|-------|
|                                                       | Mean ± SD           | Min  | Max   | Mean ± SD           | Min  | Max   |
| Cell Count Total Yield (x10 <sup>6</sup> )            | 197.4 ± 92.1        | 78.8 | 545.0 | 16.8 ± 11.7         | 2.0  | 48.0  |
| Cell Count Cryopreserved for Dose (x10 <sup>6</sup> ) | 180.5 ± 68.0        | 77.2 | 335.0 | 6.7 ± 2.3           | 1.5  | 12.0  |
| Percent Viable                                        | 96.3 ± 2.7          | 86.9 | 100.0 | 97.7 ± 2.3          | 89.4 | 100.0 |
| Percentage of cells with phenotype CD45+              | 1.1 ± 0.5           | 0.3  | 1.9   | 0.6 ± 0.3           | 0.03 | 1.3   |
| Percentage of cells with phenotype CD105+ (MSCs)      | 99.1 ± 0.9          | 95.5 | 99.9  |                     |      |       |
| Percentage of cells with phenotype CD117+ (CPCs)      |                     |      |       | 82.9 ± 5.9          | 73.3 | 97.4  |

\*Only products administered to participants included in table

MSC=mesenchymal stromal cells, CPC=ckit positive cardiac cells

Released products were all negative for aerobic, anaerobic, and fungal with negative mycoplasma PCR.

Endotoxin values ≤ 5.000 EU/ml were required for release.

**Supplemental Table 3. Advanced Characterization of C-Kit Positive Cardiac Cell (CPC) Products**

|                                                                     | n  | Mean ± SD     | Min   | Max   |
|---------------------------------------------------------------------|----|---------------|-------|-------|
| <b>Cardiogenic Markers (%)</b>                                      |    |               |       |       |
| Homeobox protein NKx2.5                                             | 27 | 97.21 ± 1.98  | 93    | 100   |
| GATA transcription factor                                           | 27 | 95.24 ± 4.33  | 80.3  | 100   |
| Myocyte Enhancer Factor 2C (MEF2c)                                  | 27 | 88.21 ± 9.19  | 62    | 99    |
| p16 <sup>INK4a</sup> (Inhibitor of cyclin-dependent kinases)        | 27 | 0.34 ± 0.47   | 0     | 1.2   |
| Von Willebrand Factor protein (vWF)                                 | 27 | 99.37 ± 0.48  | 98    | 100   |
| α-Sarcomeric Actin                                                  | 20 | 93.10 ± 21.63 | 2     | 100   |
| <b>Hematopoietic stem/progenitor cell markers (%)</b>               |    |               |       |       |
| CD11b                                                               | 35 | 7.58 ± 9.09   | 0.96  | 47.63 |
| CD14                                                                | 35 | 6.84 ± 3.70   | 1.58  | 17.6  |
| CD16                                                                | 34 | 14.46 ± 9.92  | 1.72  | 40.34 |
| CD19                                                                | 33 | 1.54 ± 0.77   | 0.23  | 3.74  |
| CD29                                                                | 28 | 96.68 ± 2.67  | 87.81 | 99.16 |
| CD31                                                                | 35 | 5.16 ± 6.61   | 0.67  | 2.17  |
| CD34                                                                | 35 | 17.09 ± 11.54 | 1.05  | 42.71 |
| CD73                                                                | 28 | 97.50 ± 2.19  | 88.33 | 99.21 |
| CD90                                                                | 35 | 38.94 ± 25.99 | 1.2   | 94.2  |
| CD105                                                               | 35 | 94.92 ± 5.88  | 68.05 | 99.2  |
| CD133                                                               | 35 | 1.69 ± 2.26   | 0.14  | 13.08 |
| CXCR4 (also known as CD184)                                         | 35 | 6.87 ± 5.66   | 0.41  | 22.45 |
| <b>Senescence</b>                                                   |    |               |       |       |
| Telomere Length (kb)                                                | 24 | 8.96 ± 1.99   | 6     | 13    |
| Telomere Activity (relative telomerase activity to Hela cells- RTA) | 31 | 2.98 ± 1.77   | 0.6   | 8.3   |



**Supplemental Table 4. Patients with Events by System Organ Class and Treatment Group\***

| System Organ Class†                                                 | Pre-RZ<br>Consented<br>(N=193) | Post-RZ<br>Randomized<br>(N=125) | MSCs+CPCs<br>(n=33) | MSCs<br>(n=29) | CPCs<br>(n=31) | Placebo<br>(n=32) | P-value |
|---------------------------------------------------------------------|--------------------------------|----------------------------------|---------------------|----------------|----------------|-------------------|---------|
| Any system organ class‡                                             | 12 (6.2%)                      | 93 (74.4%)                       | 22 (66.7%)          | 23 (79.3%)     | 25 (80.6%)     | 23 (71.9%)        | 0.564   |
| Blood and lymphatic system disorders                                | 0 (0%)                         | 10 (8%)                          | 3 (9.1%)            | 2 (6.9%)       | 3 (9.7%)       | 2 (6.2%)          | 0.971   |
| Cardiac disorders                                                   | 3 (1.6%)                       | 56 (44.8%)                       | 14 (42.4%)          | 8 (27.6%)      | 17 (54.8%)     | 17 (53.1%)        | 0.126   |
| Eye disorders                                                       | 0 (0%)                         | 3 (2.4%)                         | 1 (3%)              | 1 (3.4%)       | 1 (3.2%)       | 0 (0%)            | 0.801   |
| Gastrointestinal disorders                                          | 0 (0%)                         | 11 (8.8%)                        | 0 (0%)              | 5 (17.2%)      | 2 (6.5%)       | 4 (12.5%)         | 0.054   |
| General disorders and administration site conditions                | 0 (0%)                         | 9 (7.2%)                         | 0 (0%)              | 5 (17.2%)      | 2 (6.5%)       | 2 (6.2%)          | 0.06    |
| Hepatobiliary disorders                                             | 1 (0.5%)                       | 2 (1.6%)                         | 2 (6.1%)            | 0 (0%)         | 0 (0%)         | 0 (0%)            | 0.245   |
| Infections and infestations                                         | 2 (1%)                         | 28 (22.4%)                       | 8 (24.2%)           | 3 (10.3%)      | 5 (16.1%)      | 12 (37.5%)        | 0.069   |
| Injury, poisoning and procedural complications                      | 2 (1%)                         | 15 (12%)                         | 5 (15.2%)           | 6 (20.7%)      | 2 (6.5%)       | 2 (6.2%)          | 0.57    |
| Investigations                                                      | 1 (0.5%)                       | 7 (5.6%)                         | 4 (12.1%)           | 0 (0%)         | 1 (3.2%)       | 2 (6.2%)          | 0.087   |
| Metabolism and nutrition disorders                                  | 1 (0.5%)                       | 10 (8%)                          | 2 (6.1%)            | 2 (6.9%)       | 3 (9.7%)       | 3 (9.4%)          | 0.943   |
| Musculoskeletal and connective tissue disorders                     | 1 (0.5%)                       | 11 (8.8%)                        | 2 (6.1%)            | 4 (13.8%)      | 3 (9.7%)       | 2 (6.2%)          | 0.771   |
| Neoplasms benign, malignant and unspecified (incl cysts and polyps) | 1 (0.5%)                       | 7 (5.6%)                         | 2 (6.1%)            | 1 (3.4%)       | 4 (12.9%)      | 0 (0%)            | 0.216   |
| Nervous system disorders                                            | 1 (0.5%)                       | 12 (9.6%)                        | 3 (9.1%)            | 4 (13.8%)      | 1 (3.2%)       | 4 (12.5%)         | 0.36    |
| Product issues                                                      | 0 (0%)                         | 4 (3.2%)                         | 1 (3%)              | 0 (0%)         | 1 (3.2%)       | 2 (6.2%)          | 0.848   |
| Renal and urinary disorders                                         | 0 (0%)                         | 16 (12.8%)                       | 3 (9.1%)            | 1 (3.4%)       | 6 (19.4%)      | 6 (18.8%)         | 0.167   |
| Reproductive system and breast disorders                            | 0 (0%)                         | 3 (2.4%)                         | 0 (0%)              | 2 (6.9%)       | 0 (0%)         | 1 (3.1%)          | 0.139   |
| Respiratory, thoracic and mediastinal disorders                     | 1 (0.5%)                       | 11 (8.8%)                        | 2 (6.1%)            | 2 (6.9%)       | 1 (3.2%)       | 6 (18.8%)         | 0.206   |
| Skin and subcutaneous tissue disorders                              | 0 (0%)                         | 7 (5.6%)                         | 2 (6.1%)            | 0 (0%)         | 1 (3.2%)       | 4 (12.5%)         | 0.217   |
| Surgical and medical procedures                                     | 0 (0%)                         | 8 (6.4%)                         | 2 (6.1%)            | 3 (10.3%)      | 2 (6.5%)       | 1 (3.1%)          | 0.68    |
| Vascular disorders                                                  | 0 (0%)                         | 10 (8%)                          | 1 (3%)              | 3 (10.3%)      | 1 (3.2%)       | 5 (15.6%)         | 0.227   |

\*Total number of patients with events, N=99

†System Organ Classification by MedDRA version 19.1

‡Patients could have events in more than one SOC class

Denominators are per column

Pre-RZ=patients with events occurring prior to randomization, Post-RZ=patient with events occurring after randomization

MSC=mesenchymal stromal cells, CPC=ckit positive cardiac cells

**Supplemental Table 5. Patients with MACE and Other Significant Clinical Events by Treatment Group (As Treated)**

|                                                                         | <b>Post-RZ</b><br>(N = 125) | <b>Not Treated</b><br>(N = 15) | <b>MSCs+CPCs</b><br>(N = 20) | <b>MSCs</b><br>(N = 21) | <b>CPCs</b><br>(N = 28) | <b>Placebo</b><br>(N = 41) | <b>P-value</b> |
|-------------------------------------------------------------------------|-----------------------------|--------------------------------|------------------------------|-------------------------|-------------------------|----------------------------|----------------|
| Patients with MACE and Other Significant Clinical Events*               | 43 (34.4%)                  | 9 (60%)                        | 6 (30%)                      | 7 (33.3%)               | 5 (17.9%)               | 16 (39%)                   | 0.083          |
| Patients with Major Adverse Cardiac Events (MACE)                       | 21 (16.8%)                  | 5 (33.3%)                      | 1 (5%)                       | 4 (19%)                 | 1 (3.6%)                | 10 (24.4%)                 | 0.027          |
| Death                                                                   | 11 (8.8%)                   | 3 (20%)                        | 1 (5%)                       | 2 (9.5%)                | 1 (3.6%)                | 4 (9.8%)                   | 0.486          |
| Hospitalization for worsening HF                                        | 14 (11.2%)                  | 3 (20%)                        | 1 (5%)                       | 2 (9.5%)                | 0 (0%)                  | 8 (19.5%)                  | 0.046          |
| Exacerbation of HF (non-hospitalization)                                | 2 (1.6%)                    | 0 (0%)                         | 0 (0%)                       | 1 (4.8%)                | 0 (0%)                  | 1 (2.4%)                   | 0.852          |
| Patients with Other Significant Clinical Events                         | 29 (23.2%)                  | 5 (33.3%)                      | 6 (30%)                      | 4 (19%)                 | 5 (17.9%)               | 9 (22%)                    | 0.711          |
| Non-fatal stroke                                                        | 2 (1.6%)                    | 0 (0%)                         | 1 (5%)                       | 0 (0%)                  | 0 (0%)                  | 1 (2.4%)                   | 0.741          |
| Non-fatal MI                                                            | 4 (3.2%)                    | 1 (6.7%)                       | 0 (0%)                       | 1 (4.8%)                | 1 (3.6%)                | 1 (2.4%)                   | 0.853          |
| Coronary artery revascularization                                       | 7 (5.6%)                    | 1 (6.7%)                       | 1 (5%)                       | 2 (9.5%)                | 1 (3.6%)                | 2 (4.9%)                   | 0.931          |
| Ventricular tachycardia / fibrillation                                  | 19 (15.2%)                  | 5 (33.3%)                      | 4 (20%)                      | 3 (14.3%)               | 3 (10.7%)               | 4 (9.8%)                   | 0.256          |
| Pericardial tamponade                                                   | 2 (1.6%)                    | 0 (0%)                         | 1 (5%)                       | 0 (0%)                  | 0 (0%)                  | 1 (2.4%)                   | 0.741          |
| Patients with MACE and Other Significant Clinical Events that were SAEs | 37 (29.6%)                  | 9 (60%)                        | 5 (25%)                      | 6 (28.6%)               | 3 (10.7%)               | 14 (34.1%)                 | 0.017          |

\*Categories of MACE and Patients with Other Significant Clinical Events are not mutually exclusive.

Denominators are per column

MACE=major adverse cardiac event, MSC=mesenchymal stromal cells, CPC=c-kit positive cardiac cells HF=heart failure; MI=myocardial infarction, SAE=serious adverse event

**Supplemental Table 6. Endpoint Analysis for Baseline to 6 Month (Intention to Treat)**

| Function                          |           |              |           |              |           |              |         |              |                                        |                         |                         |                 |
|-----------------------------------|-----------|--------------|-----------|--------------|-----------|--------------|---------|--------------|----------------------------------------|-------------------------|-------------------------|-----------------|
| LVEF (%)                          |           |              |           |              |           |              |         |              |                                        |                         |                         |                 |
|                                   | MSC + CPC |              | MSCs only |              | CPCs only |              | Placebo |              | MSC + CPC vs. Placebo                  | MSCs Only vs. Placebo   | CPCs Only vs. Placebo   |                 |
|                                   | [N]       | MEAN (SD)    | [N]       | MEAN (SD)    | [N]       | MEAN (SD)    | [N]     | MEAN (SD)    |                                        |                         |                         |                 |
| Baseline                          | [28]      | 29.70 (6.92) | [24]      | 29.06 (6.04) | [25]      | 26.16 (5.02) | [25]    | 29.48 (6.03) | Mean Difference (SE)                   | -0.08 (1.05)            | 0.70 (0.96)             | 1.38 (1.05)     |
| 6 Month                           | [28]      | 29.29 (5.79) | [24]      | 29.43 (7.00) | [25]      | 27.21 (6.01) | [25]    | 29.14 (4.81) | ANCOVA adjusted for Baseline (p-value) | 0.993                   | 0.499                   | 0.578           |
| Delta                             | [28]      | -0.42 (3.90) | [24]      | 0.37 (2.95)  | [25]      | 1.05 (3.68)  | [25]    | -0.33 (3.73) | 95% Confidence Interval                | -2.190 to 2.023         | -1.229 to 2.635         | -0.729 to 3.485 |
| Within group p-value              |           | 0.578        |           | 0.544        |           | 0.168        |         | 0.661        |                                        |                         |                         |                 |
|                                   |           |              |           |              |           |              |         |              | MSC + CPC vs. CPCs Only                | MSC + CPC vs. MSCs Only | MSCs Only vs. CPCs Only |                 |
|                                   |           |              |           |              |           |              |         |              | Mean Difference (SE)                   | -1.46 (1.04)            | -0.79 (0.95)            | 0.67 (0.95)     |
|                                   |           |              |           |              |           |              |         |              | ANCOVA adjusted for Baseline (p-value) | 0.523                   | 0.471                   | 0.485           |
|                                   |           |              |           |              |           |              |         |              | 95% Confidence Interval                | -3.552 to 0.629         | -2.7 to 1.127           | -1.240 to 2.590 |
| Global Circumferential Strain (%) |           |              |           |              |           |              |         |              |                                        |                         |                         |                 |
|                                   | MSC + CPC |              | MSCs only |              | CPCs only |              | Placebo |              | MSC + CPC vs. Placebo                  | MSCs Only vs. Placebo   | CPCs Only vs. Placebo   |                 |
|                                   | [N]       | MEAN (SD)    | [N]       | MEAN (SD)    | [N]       | MEAN (SD)    | [N]     | MEAN (SD)    |                                        |                         |                         |                 |
| Baseline                          | [26]      | -8.70 (2.50) | [17]      | -8.63 (3.23) | [22]      | -8.30 (2.88) | [16]    | -9.03 (3.73) | Mean Difference (SE)                   | -0.26 (1.05)            | 0.58 (1.17)             | 0.66 (0.95)     |
| 6 Month                           | [26]      | -9.06 (3.34) | [17]      | -8.15 (2.57) | [22]      | -7.74 (2.96) | [16]    | -9.13 (2.29) | ANCOVA adjusted for Baseline (p-value) | 0.942                   | 0.282                   | 0.163           |
| Delta                             | [26]      | -0.36 (3.20) | [17]      | 0.48 (3.36)  | [22]      | 0.56 (2.08)  | [16]    | -0.10 (3.38) | 95% Confidence Interval                | -2.406 to 1.887         | -1.815 to 2.975         | -1.310 to 2.635 |
| Within group p-value              |           | 0.572        |           | 0.564        |           | 0.219        |         | 0.907        |                                        |                         |                         |                 |
|                                   |           |              |           |              |           |              |         |              | MSC + CPC vs. CPCs Only                | MSC + CPC vs. MSCs Only | MSCs Only vs. CPCs Only |                 |
|                                   |           |              |           |              |           |              |         |              | Mean Difference (SE)                   | -0.92 (0.77)            | -0.84 (1.03)            | 0.08 (0.93)     |
|                                   |           |              |           |              |           |              |         |              | ANCOVA adjusted for Baseline (p-value) | 0.175                   | 0.329                   | 0.752           |
|                                   |           |              |           |              |           |              |         |              | 95% Confidence Interval                | -2.471 to 0.628         | -2.932 to 1.254         | -1.829 to 1.994 |

| Function                |           |                |           |                |           |                |         |                |                                        |                         |                         |                  |
|-------------------------|-----------|----------------|-----------|----------------|-----------|----------------|---------|----------------|----------------------------------------|-------------------------|-------------------------|------------------|
| Longitudinal Strain (%) |           |                |           |                |           |                |         |                |                                        |                         |                         |                  |
|                         | MSC + CPC |                | MSCs only |                | CPCs only |                | Placebo |                | MSC + CPC vs. Placebo                  | MSCs Only vs. Placebo   | CPCs Only vs. Placebo   |                  |
|                         | [N]       | MEAN (SD)      | [N]       | MEAN (SD)      | [N]       | MEAN (SD)      | [N]     | MEAN (SD)      |                                        |                         |                         |                  |
| Baseline                | [26]      | -10.18 (2.85)  | [18]      | -10.00 (2.42)  | [22]      | -9.47 (2.51)   | [17]    | -9.58 (2.93)   | Mean Difference (SE)                   | 0.40 (0.75)             | 0.40 (0.81)             | 0.15 (0.80)      |
| 6 Month                 | [26]      | -10.68 (3.16)  | [18]      | -10.51 (2.82)  | [22]      | -10.22 (2.69)  | [17]    | -10.49 (2.97)  | ANCOVA adjusted for Baseline (p-value) | 0.733                   | 0.735                   | 0.794            |
| Delta                   | [26]      | -0.50 (2.33)   | [18]      | -0.51 (2.33)   | [22]      | -0.76 (2.49)   | [17]    | -0.91 (2.44)   | 95% Confidence Interval                | -1.118 to 1.927         | -1.248 to 2.041         | -1.464 to 1.767  |
| Within group p-value    |           | 0.282          |           | 0.366          |           | 0.170          |         | 0.145          |                                        |                         |                         |                  |
|                         |           |                |           |                |           |                |         |                | MSC + CPC vs. CPCs Only                | MSC + CPC vs. MSCs Only | MSCs Only vs. CPCs Only |                  |
|                         |           |                |           |                |           |                |         |                | Mean Difference (SE)                   | 0.25 (0.70)             | 0.01 (0.71)             | -0.24 (0.76)     |
|                         |           |                |           |                |           |                |         |                | ANCOVA adjusted for Baseline (p-value) | 0.951                   | 0.962                   | 0.945            |
|                         |           |                |           |                |           |                |         |                | 95% Confidence Interval                | -1.161 to 1.666         | -1.441 to 1.457         | -1.793 to 1.303  |
| Structure               |           |                |           |                |           |                |         |                |                                        |                         |                         |                  |
| LVEDVI (mL/m2)          |           |                |           |                |           |                |         |                |                                        |                         |                         |                  |
|                         | MSC + CPC |                | MSCs only |                | CPCs only |                | Placebo |                | MSC + CPC vs. Placebo                  | MSCs Only vs. Placebo   | CPCs Only vs. Placebo   |                  |
|                         | [N]       | MEAN (SD)      | [N]       | MEAN (SD)      | [N]       | MEAN (SD)      | [N]     | MEAN (SD)      |                                        |                         |                         |                  |
| Baseline                | [28]      | 126.14 (28.99) | [24]      | 128.71 (35.39) | [25]      | 133.33 (25.99) | [25]    | 126.36 (30.00) | Mean Difference (SE)                   | -2.02 (3.85)            | -2.78 (3.39)            | -4.13 (3.42)     |
| 6 Month                 | [28]      | 127.11 (30.36) | [24]      | 128.92 (33.69) | [25]      | 132.19 (22.20) | [25]    | 129.35 (30.31) | ANCOVA adjusted for Baseline (p-value) | 0.602                   | 0.443                   | 0.348            |
| Delta                   | [28]      | 0.97 (16.06)   | [24]      | 0.21 (11.91)   | [25]      | -1.13 (12.37)  | [25]    | 2.99 (11.84)   | 95% Confidence Interval                | -9.754 to 5.711         | -9.609 to 4.044         | -11.011 to 2.760 |
| Within group p-value    |           | 0.752          |           | 0.932          |           | 0.651          |         | 0.218          |                                        |                         |                         |                  |
|                         |           |                |           |                |           |                |         |                | MSC + CPC vs. CPCs Only                | MSC + CPC vs. MSCs Only | MSCs Only vs. CPCs Only |                  |
|                         |           |                |           |                |           |                |         |                | Mean Difference (SE)                   | 2.10 (3.92)             | 0.76 (3.89)             | -1.34 (3.47)     |
|                         |           |                |           |                |           |                |         |                | ANCOVA adjusted for Baseline (p-value) | 0.812                   | 0.900                   | 0.848            |
|                         |           |                |           |                |           |                |         |                | 95% Confidence Interval                | -5.760 to 9.968         | -7.052 to 8.574         | -8.321 to 5.635  |

| Structure                   |           |               |           |               |           |               |         |               |                                        |                         |                         |                  |
|-----------------------------|-----------|---------------|-----------|---------------|-----------|---------------|---------|---------------|----------------------------------------|-------------------------|-------------------------|------------------|
| LVESVI (mL/m <sup>2</sup> ) |           |               |           |               |           |               |         |               |                                        |                         |                         |                  |
|                             | MSC + CPC |               | MSCs only |               | CPCs only |               | Placebo |               | MSC + CPC vs. Placebo                  | MSCs Only vs. Placebo   | CPCs Only vs. Placebo   |                  |
|                             | [N]       | MEAN (SD)     | [N]       | MEAN (SD)     | [N]       | MEAN (SD)     | [N]     | MEAN (SD)     |                                        |                         |                         |                  |
| Baseline                    | [28]      | 89.73 (27.17) | [24]      | 92.82 (31.90) | [25]      | 99.04 (23.61) | [25]    | 90.16 (27.29) | Mean Difference (SE)                   | -1.25 (3.01)            | -2.46 (3.06)            | -4.60 (3.08)     |
| 6 Month                     | [28]      | 90.72 (26.45) | [24]      | 92.59 (31.04) | [25]      | 96.67 (20.35) | [25]    | 92.39 (26.07) | ANCOVA adjusted for Baseline (p-value) | 0.659                   | 0.466                   | 0.293            |
| Delta                       | [28]      | 0.98 (11.17)  | [24]      | -0.22 (10.75) | [25]      | -2.37 (11.09) | [25]    | 2.23 (10.69)  | 95% Confidence Interval                | -7.281 to 4.789         | -8.621 to 3.710         | -10.799 to 1.594 |
| Within group p-value        |           | 0.645         |           | 0.919         |           | 0.296         |         | 0.307         |                                        |                         |                         |                  |
|                             |           |               |           |               |           |               |         |               | MSC + CPC vs. CPCs Only                | MSC + CPC vs. MSCs Only | MSCs Only vs. CPCs Only |                  |
|                             |           |               |           |               |           |               |         |               | Mean Difference (SE)                   | 3.36 (3.06)             | 1.21 (3.05)             | -2.15 (3.12)     |
|                             |           |               |           |               |           |               |         |               | ANCOVA adjusted for Baseline (p-value) | 0.530                   | 0.761                   | 0.669            |
|                             |           |               |           |               |           |               |         |               | 95% Confidence Interval                | -2.795 to 9.508         | -4.910 to 7.330         | -8.426 to 4.132  |
| Sphericity (ml)             |           |               |           |               |           |               |         |               |                                        |                         |                         |                  |
|                             | MSC + CPC |               | MSCs only |               | CPCs only |               | Placebo |               | MSC + CPC vs. Placebo                  | MSCs Only vs. Placebo   | CPCs Only vs. Placebo   |                  |
|                             | [N]       | MEAN (SD)     | [N]       | MEAN (SD)     | [N]       | MEAN (SD)     | [N]     | MEAN (SD)     |                                        |                         |                         |                  |
| Baseline                    | [26]      | 0.57 (0.10)   | [24]      | 0.56 (0.09)   | [25]      | 0.58 (0.10)   | [25]    | 0.56 (0.18)   | Mean Difference (SE)                   | -0.00 (0.02)            | -0.01 (0.02)            | -0.01 (0.02)     |
| 6 Month                     | [26]      | 0.58 (0.10)   | [24]      | 0.55 (0.08)   | [25]      | 0.58 (0.09)   | [25]    | 0.57 (0.14)   | ANCOVA adjusted for Baseline (p-value) | 0.989                   | 0.493                   | 0.926            |
| Delta                       | [26]      | 0.00 (0.07)   | [24]      | -0.00 (0.07)  | [25]      | 0.00 (0.08)   | [25]    | 0.01 (0.08)   | 95% Confidence Interval                | -0.048 to 0.040         | -0.056 to 0.033         | -0.053 to 0.039  |
| Within group p-value        |           | 0.834         |           | 0.785         |           | 0.991         |         | 0.664         |                                        |                         |                         |                  |
|                             |           |               |           |               |           |               |         |               | MSC + CPC vs. CPCs Only                | MSC + CPC vs. MSCs Only | MSCs Only vs. CPCs Only |                  |
|                             |           |               |           |               |           |               |         |               | Mean Difference (SE)                   | 0.00 (0.02)             | 0.01 (0.02)             | -0.00 (0.02)     |
|                             |           |               |           |               |           |               |         |               | ANCOVA adjusted for Baseline (p-value) | 0.904                   | 0.476                   | 0.515            |
|                             |           |               |           |               |           |               |         |               | 95% Confidence Interval                | -0.041 to 0.047         | -0.035 to 0.049         | -0.040 to 0.048  |

| <b>Morphology</b>            |                  |                  |                  |                  |                  |                  |                |                  |                                               |                                |                                |                 |
|------------------------------|------------------|------------------|------------------|------------------|------------------|------------------|----------------|------------------|-----------------------------------------------|--------------------------------|--------------------------------|-----------------|
| <b>Scar Size Percent (%)</b> |                  |                  |                  |                  |                  |                  |                |                  |                                               |                                |                                |                 |
|                              | <b>MSC + CPC</b> |                  | <b>MSCs only</b> |                  | <b>CPCs only</b> |                  | <b>Placebo</b> |                  | <b>MSC + CPC vs. Placebo</b>                  | <b>MSCs Only vs. Placebo</b>   | <b>CPCs Only vs. Placebo</b>   |                 |
|                              | <b>[N]</b>       | <b>MEAN (SD)</b> | <b>[N]</b>       | <b>MEAN (SD)</b> | <b>[N]</b>       | <b>MEAN (SD)</b> | <b>[N]</b>     | <b>MEAN (SD)</b> |                                               |                                |                                |                 |
| <b>Baseline</b>              | [22]             | 18.76 (6.60)     | [20]             | 20.19 (5.96)     | [22]             | 18.93 (4.88)     | [21]           | 21.44 (5.47)     | <b>Mean Difference (SE)</b>                   | -0.04 (0.85)                   | -0.17 (0.80)                   | -0.52 (0.71)    |
| <b>6 Month</b>               | [22]             | 18.18 (6.24)     | [20]             | 19.49 (6.69)     | [22]             | 17.87 (5.05)     | [21]           | 20.90 (5.13)     | <b>ANCOVA adjusted for Baseline (p-value)</b> | 0.569                          | 0.767                          | 0.261           |
| <b>Delta</b>                 | [22]             | -0.57 (3.25)     | [20]             | -0.70 (2.80)     | [22]             | -1.06 (2.40)     | [21]           | -0.53 (2.29)     | <b>95% Confidence Interval</b>                | -1.770 to 1.687                | -1.792 to 1.457                | -1.965 to 0.921 |
| <b>Within group p-value</b>  | 0.416            |                  | 0.278            |                  | 0.051            |                  | 0.299          |                  |                                               |                                |                                |                 |
|                              |                  |                  |                  |                  |                  |                  |                |                  | <b>MSC + CPC vs. CPCs Only</b>                | <b>MSC + CPC vs. MSCs Only</b> | <b>MSCs Only vs. CPCs Only</b> |                 |
|                              |                  |                  |                  |                  |                  |                  |                |                  | <b>Mean Difference (SE)</b>                   | 0.48 (0.86)                    | 0.13 (0.93)                    | -0.36 (0.81)    |
|                              |                  |                  |                  |                  |                  |                  |                |                  | <b>ANCOVA adjusted for Baseline (p-value)</b> | 0.587                          | 0.994                          | 0.639           |
|                              |                  |                  |                  |                  |                  |                  |                |                  | <b>95% Confidence Interval</b>                | -1.261 to 2.222                | -1.763 to 2.014                | -1.993 to 1.283 |
| <b>Scar Tissue Mass (g)</b>  |                  |                  |                  |                  |                  |                  |                |                  |                                               |                                |                                |                 |
|                              | <b>MSC + CPC</b> |                  | <b>MSCs only</b> |                  | <b>CPCs only</b> |                  | <b>Placebo</b> |                  | <b>MSC + CPC vs. Placebo</b>                  | <b>MSCs Only vs. Placebo</b>   | <b>CPCs Only vs. Placebo</b>   |                 |
|                              | <b>[N]</b>       | <b>MEAN (SD)</b> | <b>[N]</b>       | <b>MEAN (SD)</b> | <b>[N]</b>       | <b>MEAN (SD)</b> | <b>[N]</b>     | <b>MEAN (SD)</b> |                                               |                                |                                |                 |
| <b>Baseline</b>              | [22]             | 31.14 (10.84)    | [20]             | 31.25 (12.32)    | [22]             | 32.86 (10.30)    | [21]           | 35.42 (10.84)    | <b>Mean Difference (SE)</b>                   | 0.44 (1.42)                    | 0.18 (1.22)                    | -1.20 (1.31)    |
| <b>6 Month</b>               | [22]             | 30.27 (11.07)    | [20]             | 30.12 (11.97)    | [22]             | 30.35 (9.51)     | [21]           | 34.11 (10.29)    | <b>ANCOVA adjusted for Baseline (p-value)</b> | 0.992                          | 0.862                          | 0.217           |
| <b>Delta</b>                 | [22]             | -0.87 (5.21)     | [20]             | -1.13 (3.71)     | [22]             | -2.51 (4.51)     | [21]           | -1.31 (4.07)     | <b>95% Confidence Interval</b>                | -2.437 to 3.319                | -2.278 to 2.643                | -3.846 to 1.443 |
| <b>Within group p-value</b>  | 0.443            |                  | 0.190            |                  | 0.016            |                  | 0.156          |                  |                                               |                                |                                |                 |
|                              |                  |                  |                  |                  |                  |                  |                |                  | <b>MSC + CPC vs. CPCs Only</b>                | <b>MSC + CPC vs. MSCs Only</b> | <b>MSCs Only vs. CPCs Only</b> |                 |
|                              |                  |                  |                  |                  |                  |                  |                |                  | <b>Mean Difference (SE)</b>                   | 1.64 (1.47)                    | 0.26 (1.39)                    | -1.38 (1.27)    |
|                              |                  |                  |                  |                  |                  |                  |                |                  | <b>ANCOVA adjusted for Baseline (p-value)</b> | 0.327                          | 0.859                          | 0.338           |
|                              |                  |                  |                  |                  |                  |                  |                |                  | <b>95% Confidence Interval</b>                | -1.325 to 4.611                | -2.551 to 3.068                | -3.952 to 1.184 |

| Functional Capacity              |           |                |           |                 |           |                |         |                |                                        |                         |                         |                         |
|----------------------------------|-----------|----------------|-----------|-----------------|-----------|----------------|---------|----------------|----------------------------------------|-------------------------|-------------------------|-------------------------|
| Peak V0 <sub>2</sub> (ml/kg/min) |           |                |           |                 |           |                |         |                |                                        |                         |                         |                         |
|                                  | MSC + CPC |                | MSCs only |                 | CPCs only |                | Placebo |                |                                        | MSC + CPC vs. Placebo   | MSCs Only vs. Placebo   | CPCs Only vs. Placebo   |
|                                  | [N]       | MEAN (SD)      | [N]       | MEAN (SD)       | [N]       | MEAN (SD)      | [N]     | MEAN (SD)      |                                        |                         |                         |                         |
| Baseline                         | [28]      | 16.63 (5.23)   | [23]      | 17.67 (5.37)    | [25]      | 15.80 (4.59)   | [26]    | 16.41 (4.55)   | Mean Difference (SE)                   | -1.02 (0.71)            | -0.97 (0.90)            | 0.63 (0.73)             |
| 6 Month                          | [28]      | 15.74 (4.56)   | [23]      | 16.83 (4.33)    | [25]      | 16.57 (5.76)   | [26]    | 16.55 (4.89)   | ANCOVA adjusted for Baseline (p-value) | 0.157                   | 0.428                   | 0.382                   |
| Delta                            | [28]      | -0.89 (2.94)   | [23]      | -0.83 (3.75)    | [25]      | 0.77 (2.86)    | [26]    | 0.13 (2.28)    | 95% Confidence Interval                | -2.456 to 0.411         | -2.798 to 0.859         | -0.83 to 2.093          |
| Within group p-value             |           | 0.122          |           | 0.297           |           | 0.193          |         | 0.766          |                                        |                         |                         |                         |
|                                  |           |                |           |                 |           |                |         |                |                                        | MSC + CPC vs. CPCs Only | MSC + CPC vs. MSCs Only | MSCs Only vs. CPCs Only |
|                                  |           |                |           |                 |           |                |         |                | Mean Difference (SE)                   | -1.65 (0.80)            | -0.05 (0.96)            | 1.60 (0.97)             |
|                                  |           |                |           |                 |           |                |         |                | ANCOVA adjusted for Baseline (p-value) | 0.056                   | 0.610                   | 0.195                   |
|                                  |           |                |           |                 |           |                |         |                | 95% Confidence Interval                | -3.255 to -0.052        | -1.991 to 1.885         | -0.356 to 3.557         |
| Exercise Tolerance - 6 MWT (m)   |           |                |           |                 |           |                |         |                |                                        |                         |                         |                         |
|                                  | MSC + CPC |                | MSCs only |                 | CPCs only |                | Placebo |                |                                        | MSC + CPC vs. Placebo   | MSCs Only vs. Placebo   | CPCs Only vs. Placebo   |
|                                  | [N]       | MEAN (SD)      | [N]       | MEAN (SD)       | [N]       | MEAN (SD)      | [N]     | MEAN (SD)      |                                        |                         |                         |                         |
| Baseline                         | [29]      | 371.07 (80.09) | [24]      | 366.90 (92.99)  | [25]      | 377.52 (88.20) | [27]    | 376.11 (90.43) | Mean Difference (SE)                   | 18.57 (19.01)           | 23.19 (17.88)           | 1.69 (16.21)            |
| 6 Month                          | [29]      | 390.31 (90.46) | [24]      | 390.75 (102.81) | [25]      | 379.88 (93.55) | [27]    | 376.78 (94.32) | ANCOVA adjusted for Baseline (p-value) | 0.348                   | 0.230                   | 0.905                   |
| Delta                            | [29]      | 19.24 (71.65)  | [24]      | 23.85 (57.03)   | [25]      | 2.36 (44.30)   | [27]    | 0.67 (70.54)   | 95% Confidence Interval                | -19.537 to 56.687       | -12.759 to 59.134       | -30.974 to 34.361       |
| Within group p-value             |           | 0.159          |           | 0.052           |           | 0.792          |         | 0.961          |                                        |                         |                         |                         |
|                                  |           |                |           |                 |           |                |         |                |                                        | MSC + CPC vs. CPCs Only | MSC + CPC vs. MSCs Only | MSCs Only vs. CPCs Only |
|                                  |           |                |           |                 |           |                |         |                | Mean Difference (SE)                   | 16.88 (15.98)           | -4.61 (17.68)           | -21.49 (14.63)          |
|                                  |           |                |           |                 |           |                |         |                | ANCOVA adjusted for Baseline (p-value) | 0.335                   | 0.827                   | 0.163                   |
|                                  |           |                |           |                 |           |                |         |                | 95% Confidence Interval                | -15.267 to 49.030       | -40.106 to 30.880       | -50.989 to 8.001        |

| Functional Capacity  |           |                   |           |                 |           |                   |         |                   |                                        |                         |                         |                  |
|----------------------|-----------|-------------------|-----------|-----------------|-----------|-------------------|---------|-------------------|----------------------------------------|-------------------------|-------------------------|------------------|
| MLHFQ Summary Score  |           |                   |           |                 |           |                   |         |                   |                                        |                         |                         |                  |
|                      | MSC + CPC |                   | MSCs only |                 | CPCs only |                   | Placebo |                   | MSC + CPC vs. Placebo                  | MSCs Only vs. Placebo   | CPCs Only vs. Placebo   |                  |
|                      | [N]       | MEAN (SD)         | [N]       | MEAN (SD)       | [N]       | MEAN (SD)         | [N]     | MEAN (SD)         |                                        |                         |                         |                  |
| Baseline             | [30]      | 40.86 (23.35)     | [24]      | 50.71 (22.97)   | [25]      | 30.34 (23.82)     | [28]    | 39.93 (24.83)     | Mean Difference (SE)                   | -9.64 (4.63)            | -15.09 (5.84)           | -2.97 (5.86)     |
| 6 Month              | [30]      | 25.54 (19.09)     | [24]      | 29.93 (18.37)   | [25]      | 21.69 (18.47)     | [28]    | 34.25 (23.23)     | ANCOVA adjusted for Baseline (p-value) | 0.023                   | 0.050                   | 0.119            |
| Delta                | [30]      | -15.32 (16.94)    | [24]      | -20.78 (23.11)  | [25]      | -8.65 (23.72)     | [28]    | -5.68 (18.23)     | 95% Confidence Interval                | -18.915 to -0.357       | -26.871 to -3.319       | -14.784 to 8.836 |
| Within group p-value | 0.000     |                   | 0.000     |                 | 0.081     |                   | 0.111   |                   |                                        |                         |                         |                  |
|                      |           |                   |           |                 |           |                   |         |                   | MSC + CPC vs. CPCs Only                | MSC + CPC vs. MSCs Only | MSCs Only vs. CPCs Only |                  |
|                      |           |                   |           |                 |           |                   |         |                   | Mean Difference (SE)                   | -6.66 (5.66)            | 5.46 (5.64)             | 12.12 (6.69)     |
|                      |           |                   |           |                 |           |                   |         |                   | ANCOVA adjusted for Baseline (p-value) | 0.845                   | 0.976                   | 0.717            |
|                      |           |                   |           |                 |           |                   |         |                   | 95% Confidence Interval                | -18.087 to 4.762        | -5.931 to 16.848        | -1.337 to 25.578 |
| Biomarkers           |           |                   |           |                 |           |                   |         |                   |                                        |                         |                         |                  |
| NT-proBNP (pg/ml)*   |           |                   |           |                 |           |                   |         |                   |                                        |                         |                         |                  |
|                      | MSC + CPC |                   | MSCs only |                 | CPCs only |                   | Placebo |                   | MSC + CPC vs. Placebo                  | MSCs Only vs. Placebo   | CPCs Only vs. Placebo   |                  |
|                      | [N]       | MEAN (SD)         | [N]       | MEAN (SD)       | [N]       | MEAN (SD)         | [N]     | MEAN (SD)         |                                        |                         |                         |                  |
| Baseline             | [29]      | 1446.54 (4762.24) | [23]      | 487.83 (629.88) | [25]      | 879.94 (845.06)   | [27]    | 701.19 (1350.74)  | Mean Difference (SE)                   | -1411.7 (840.6)         | -634.6 (405.1)          | -483.2 (400.7)   |
| 6 Month              | [29]      | 722.08 (866.27)   | [23]      | 540.43 (589.59) | [25]      | 1084.04 (1070.04) | [27]    | 1388.43 (2356.32) | ANCOVA adjusted for Baseline (p-value) | 0.110                   | 0.112                   | 0.891            |
| Delta                | [29]      | -724.46 (4020.53) | [23]      | 52.60 (586.16)  | [25]      | 204.09 (533.51)   | [27]    | 687.25 (2006.72)  | 95% Confidence Interval                | -3108.3 to 284.9        | -1460.7 to 191.4        | -1301.5 to 335.2 |
| Within group p-value | 0.469     |                   | 0.289     |                 | 0.013     |                   | 0.023   |                   |                                        |                         |                         |                  |
|                      |           |                   |           |                 |           |                   |         |                   | MSC + CPC vs. CPCs Only                | MSC + CPC vs. MSCs Only | MSCs Only vs. CPCs Only |                  |
|                      |           |                   |           |                 |           |                   |         |                   | Mean Difference (SE)                   | -928.6 (754.2)          | -777.1 (756.5)          | 151.5 (162.2)    |
|                      |           |                   |           |                 |           |                   |         |                   | ANCOVA adjusted for Baseline (p-value) | 0.009                   | 0.661                   | 0.015            |
|                      |           |                   |           |                 |           |                   |         |                   | 95% Confidence Interval                | -2470.7 to 613.6        | -2323.2 to 769.1        | -175.4 to 478.4  |

\*Log transformation for NT-proBNP; p-values were obtained from transformed data. Data presented as [N] Mean (SD), unless otherwise indicated



ANCOVA model adjusted for baseline value of outcome

MSC=mesenchymal stromal cells, CPC=c-kit positive cardiac cells, LVEF=left ventricular ejection fraction, LVEDVI=left ventricular end diastolic volume index, LVESVI=left ventricular end systolic volume index, MLHFQ=Minnesota Living with Heart Failure Questionnaire, NT-proBNP= N-Terminal pro-Brain Natriuretic Peptide

**Supplemental Table 7. Endpoint Analysis for Baseline to 12 Month (Intention to Treat)**

| Function                          |           |              |           |              |           |              |         |              |                                        |                         |                         |                 |
|-----------------------------------|-----------|--------------|-----------|--------------|-----------|--------------|---------|--------------|----------------------------------------|-------------------------|-------------------------|-----------------|
| LVEF (%)                          |           |              |           |              |           |              |         |              |                                        |                         |                         |                 |
|                                   | MSC + CPC |              | MSCs only |              | CPCs only |              | Placebo |              | MSC + CPC vs. Placebo                  | MSCs Only vs. Placebo   | CPCs Only vs. Placebo   |                 |
|                                   | [N]       | MEAN (SD)    | [N]       | MEAN (SD)    | [N]       | MEAN (SD)    | [N]     | MEAN (SD)    |                                        |                         |                         |                 |
| Baseline                          | [29]      | 29.66 (6.80) | [20]      | 29.88 (6.16) | [23]      | 25.74 (4.99) | [20]    | 29.32 (6.68) | Mean Difference (SE)                   | 0.58 (1.35)             | 1.57 (1.33)             | 1.54 (1.13)     |
| 12 Month                          | [29]      | 29.91 (6.74) | [20]      | 31.12 (7.06) | [23]      | 26.96 (5.12) | [20]    | 28.99 (5.79) | ANCOVA adjusted for Baseline (p-value) | 0.606                   | 0.195                   | 0.611           |
| Delta                             | [29]      | 0.25 (6.07)  | [20]      | 1.24 (4.96)  | [23]      | 1.21 (4.12)  | [20]    | -0.33 (3.30) | 95% Confidence Interval                | -2.132 to 3.294         | -1.140 to 4.282         | -0.744 to 3.833 |
| Within group p-value              |           | 0.828        |           | 0.279        |           | 0.173        |         | 0.656        |                                        |                         |                         |                 |
|                                   |           |              |           |              |           |              |         |              | MSC + CPC vs. CPCs Only                | MSC + CPC vs. MSCs Only | MSCs Only vs. CPCs Only |                 |
|                                   |           |              |           |              |           |              |         |              | Mean Difference (SE)                   | -0.96 (1.42)            | -0.99 (1.58)            | -0.03 (1.40)    |
|                                   |           |              |           |              |           |              |         |              | ANCOVA adjusted for Baseline (p-value) | 0.713                   | 0.494                   | 0.499           |
|                                   |           |              |           |              |           |              |         |              | 95% Confidence Interval                | -3.812 to 1.883         | -4.174 to 2.193         | -2.869 to 2.817 |
| Global Circumferential Strain (%) |           |              |           |              |           |              |         |              |                                        |                         |                         |                 |
|                                   | MSC + CPC |              | MSCs only |              | CPCs only |              | Placebo |              | MSC + CPC vs. Placebo                  | MSCs Only vs. Placebo   | CPCs Only vs. Placebo   |                 |
|                                   | [N]       | MEAN (SD)    | [N]       | MEAN (SD)    | [N]       | MEAN (SD)    | [N]     | MEAN (SD)    |                                        |                         |                         |                 |
| Baseline                          | [26]      | -8.70 (2.50) | [17]      | -8.63 (3.23) | [22]      | -8.30 (2.88) | [16]    | -9.03 (3.73) | Mean Difference (SE)                   | -0.71 (0.99)            | -1.46 (1.04)            | -0.50 (1.06)    |
| 12 Month                          | [26]      | -8.46 (2.78) | [17]      | -9.14 (3.12) | [22]      | -7.85 (2.54) | [16]    | -8.08 (3.46) | ANCOVA adjusted for Baseline (p-value) | 0.492                   | 0.168                   | 0.908           |
| Delta                             | [26]      | 0.24 (2.44)  | [17]      | -0.51 (2.40) | [22]      | 0.45 (2.87)  | [16]    | 0.95 (3.45)  | 95% Confidence Interval                | -2.744 to 1.322         | -3.593 to 0.677         | -2.664 to 1.660 |
| Within group p-value              |           | 0.620        |           | 0.397        |           | 0.471        |         | 0.287        |                                        |                         |                         |                 |
|                                   |           |              |           |              |           |              |         |              | MSC + CPC vs. CPCs Only                | MSC + CPC vs. MSCs Only | MSCs Only vs. CPCs Only |                 |
|                                   |           |              |           |              |           |              |         |              | Mean Difference (SE)                   | -0.21 (0.78)            | 0.75 (0.75)             | 0.96 (0.84)     |
|                                   |           |              |           |              |           |              |         |              | ANCOVA adjusted for Baseline (p-value) | 0.548                   | 0.313                   | 0.147           |
|                                   |           |              |           |              |           |              |         |              | 95% Confidence Interval                | -1.777 to 1.359         | -0.784 to 2.277         | -0.756 to 2.666 |

| Function                |           |                |           |                |           |                |         |                |                                        |                         |                         |                  |
|-------------------------|-----------|----------------|-----------|----------------|-----------|----------------|---------|----------------|----------------------------------------|-------------------------|-------------------------|------------------|
| Longitudinal Strain (%) |           |                |           |                |           |                |         |                |                                        |                         |                         |                  |
|                         | MSC + CPC |                | MSCs only |                | CPCs only |                | Placebo |                | MSC + CPC vs. Placebo                  | MSCs Only vs. Placebo   | CPCs Only vs. Placebo   |                  |
|                         | [N]       | MEAN (SD)      | [N]       | MEAN (SD)      | [N]       | MEAN (SD)      | [N]     | MEAN (SD)      |                                        |                         |                         |                  |
| Baseline                | [26]      | -10.18 (2.85)  | [18]      | -10.00 (2.42)  | [22]      | -9.47 (2.51)   | [17]    | -9.58 (2.93)   | Mean Difference (SE)                   | 0.78 (0.95)             | -0.03 (1.01)            | 0.28 (0.99)      |
| 12 Month                | [26]      | -10.13 (2.78)  | [18]      | -10.77 (3.27)  | [22]      | -9.92 (2.68)   | [17]    | -10.32 (3.16)  | ANCOVA adjusted for Baseline (p-value) | 0.582                   | 0.836                   | 0.693            |
| Delta                   | [26]      | 0.05 (3.08)    | [18]      | -0.77 (2.97)   | [22]      | -0.45 (3.16)   | [17]    | -0.74 (3.01)   | 95% Confidence Interval                | -1.139 to 2.708         | -2.089 to 2.029         | -1.734 to 2.298  |
| Within group p-value    |           | 0.938          |           | 0.289          |           | 0.507          |         | 0.328          |                                        |                         |                         |                  |
|                         |           |                |           |                |           |                |         |                | MSC + CPC vs. CPCs Only                | MSC + CPC vs. MSCs Only | MSCs Only vs. CPCs Only |                  |
|                         |           |                |           |                |           |                |         |                | Mean Difference (SE)                   | 0.50 (0.90)             | 0.81 (0.92)             | 0.31 (0.97)      |
|                         |           |                |           |                |           |                |         |                | ANCOVA adjusted for Baseline (p-value) | 0.958                   | 0.391                   | 0.496            |
|                         |           |                |           |                |           |                |         |                | 95% Confidence Interval                | -1.319 to 2.324         | -1.057 to 2.686         | -1.656 to 2.280  |
| Structure               |           |                |           |                |           |                |         |                |                                        |                         |                         |                  |
| LVEDVI (mL/m2)          |           |                |           |                |           |                |         |                |                                        |                         |                         |                  |
|                         | MSC + CPC |                | MSCs only |                | CPCs only |                | Placebo |                | MSC + CPC vs. Placebo                  | MSCs Only vs. Placebo   | CPCs Only vs. Placebo   |                  |
|                         | [N]       | MEAN (SD)      | [N]       | MEAN (SD)      | [N]       | MEAN (SD)      | [N]     | MEAN (SD)      |                                        |                         |                         |                  |
| Baseline                | [29]      | 125.70 (28.57) | [20]      | 121.78 (33.26) | [23]      | 131.46 (26.27) | [20]    | 128.44 (31.85) | Mean Difference (SE)                   | -0.52 (5.80)            | -2.66 (5.57)            | 1.76 (5.59)      |
| 12 Month                | [29]      | 128.34 (33.74) | [20]      | 122.28 (34.15) | [23]      | 136.38 (26.22) | [20]    | 131.60 (28.99) | ANCOVA adjusted for Baseline (p-value) | 0.871                   | 0.483                   | 0.629            |
| Delta                   | [29]      | 2.64 (17.82)   | [20]      | 0.50 (12.93)   | [23]      | 4.92 (14.02)   | [20]    | 3.16 (21.29)   | 95% Confidence Interval                | -12.279 to 11.237       | -14.014 to 8.695        | -9.613 to 13.142 |
| Within group p-value    |           | 0.433          |           | 0.865          |           | 0.106          |         | 0.515          |                                        |                         |                         |                  |
|                         |           |                |           |                |           |                |         |                | MSC + CPC vs. CPCs Only                | MSC + CPC vs. MSCs Only | MSCs Only vs. CPCs Only |                  |
|                         |           |                |           |                |           |                |         |                | Mean Difference (SE)                   | -2.29 (4.42)            | 2.14 (4.39)             | 4.42 (4.11)      |
|                         |           |                |           |                |           |                |         |                | ANCOVA adjusted for Baseline (p-value) | 0.573                   | 0.639                   | 0.212            |
|                         |           |                |           |                |           |                |         |                | 95% Confidence Interval                | -11.155 to 6.584        | -6.704 to 10.979        | -3.88 to 12.727  |

| Structure            |           |               |           |               |           |                |         |               |                                        |                         |                         |                  |
|----------------------|-----------|---------------|-----------|---------------|-----------|----------------|---------|---------------|----------------------------------------|-------------------------|-------------------------|------------------|
| LVESVI (mL/m2)       |           |               |           |               |           |                |         |               |                                        |                         |                         |                  |
|                      | MSC + CPC |               | MSCs only |               | CPCs only |                | Placebo |               | MSC + CPC vs. Placebo                  | MSCs Only vs. Placebo   | CPCs Only vs. Placebo   |                  |
|                      | [N]       | MEAN (SD)     | [N]       | MEAN (SD)     | [N]       | MEAN (SD)      | [N]     | MEAN (SD)     |                                        |                         |                         |                  |
| Baseline             | [29]      | 89.43 (26.73) | [20]      | 86.73 (29.88) | [23]      | 98.24 (23.92)  | [20]    | 92.01 (29.16) | Mean Difference (SE)                   | -0.39 (4.72)            | -3.11 (4.72)            | 0.16 (4.85)      |
| 12 Month             | [29]      | 90.95 (29.45) | [20]      | 85.52 (30.57) | [23]      | 100.30 (24.39) | [20]    | 93.91 (24.27) | ANCOVA adjusted for Baseline (p-value) | 0.852                   | 0.361                   | 0.698            |
| Delta                | [29]      | 1.51 (13.02)  | [20]      | -1.21 (10.85) | [23]      | 2.06 (12.78)   | [20]    | 1.90 (18.11)  | 95% Confidence Interval                | -9.993 to 9.214         | -12.738 to 6.515        | -9.696 to 10.013 |
| Within group p-value |           | 0.536         |           | 0.625         |           | 0.447          |         | 0.643         |                                        |                         |                         |                  |
|                      |           |               |           |               |           |                |         |               | MSC + CPC vs. CPCs Only                | MSC + CPC vs. MSCs Only | MSCs Only vs. CPCs Only |                  |
|                      |           |               |           |               |           |                |         |               | Mean Difference (SE)                   | -0.55 (3.60)            | 2.72 (3.43)             | 3.27 (3.60)      |
|                      |           |               |           |               |           |                |         |               | ANCOVA adjusted for Baseline (p-value) | 0.781                   | 0.440                   | 0.271            |
|                      |           |               |           |               |           |                |         |               | 95% Confidence Interval                | -7.784 to 6.688         | -4.178 to 9.622         | -4.009 to 10.549 |
| Sphericity (ml)      |           |               |           |               |           |                |         |               |                                        |                         |                         |                  |
|                      | MSC + CPC |               | MSCs only |               | CPCs only |                | Placebo |               | MSC + CPC vs. Placebo                  | MSCs Only vs. Placebo   | CPCs Only vs. Placebo   |                  |
|                      | [N]       | MEAN (SD)     | [N]       | MEAN (SD)     | [N]       | MEAN (SD)      | [N]     | MEAN (SD)     |                                        |                         |                         |                  |
| Baseline             | [28]      | 0.57 (0.10)   | [20]      | 0.54 (0.09)   | [23]      | 0.57 (0.10)    | [20]    | 0.55 (0.12)   | Mean Difference (SE)                   | -0.00 (0.02)            | -0.01 (0.03)            | 0.00 (0.03)      |
| 12 Month             | [28]      | 0.58 (0.12)   | [20]      | 0.54 (0.09)   | [23]      | 0.59 (0.10)    | [20]    | 0.56 (0.10)   | ANCOVA adjusted for Baseline (p-value) | 0.851                   | 0.696                   | 0.515            |
| Delta                | [28]      | 0.01 (0.07)   | [20]      | 0.00 (0.08)   | [23]      | 0.01 (0.08)    | [20]    | 0.01 (0.08)   | 95% Confidence Interval                | -0.048 to 0.047         | -0.061 to 0.047         | -0.047 to 0.056  |
| Within group p-value |           | 0.578         |           | 0.952         |           | 0.448          |         | 0.666         |                                        |                         |                         |                  |
|                      |           |               |           |               |           |                |         |               | MSC + CPC vs. CPCs Only                | MSC + CPC vs. MSCs Only | MSCs Only vs. CPCs Only |                  |
|                      |           |               |           |               |           |                |         |               | Mean Difference (SE)                   | -0.01 (0.02)            | 0.01 (0.02)             | 0.01 (0.02)      |
|                      |           |               |           |               |           |                |         |               | ANCOVA adjusted for Baseline (p-value) | 0.774                   | 0.626                   | 0.330            |
|                      |           |               |           |               |           |                |         |               | 95% Confidence Interval                | -0.049 to 0.038         | -0.04 to 0.053          | -0.039 to 0.062  |

| <b>Morphology</b>            |                  |                  |                  |                  |                  |                  |                |                  |                                               |                                |                                |                 |
|------------------------------|------------------|------------------|------------------|------------------|------------------|------------------|----------------|------------------|-----------------------------------------------|--------------------------------|--------------------------------|-----------------|
| <b>Scar Size Percent (%)</b> |                  |                  |                  |                  |                  |                  |                |                  |                                               |                                |                                |                 |
|                              | <b>MSC + CPC</b> |                  | <b>MSCs only</b> |                  | <b>CPCs only</b> |                  | <b>Placebo</b> |                  | <b>MSC + CPC vs. Placebo</b>                  | <b>MSCs Only vs. Placebo</b>   | <b>CPCs Only vs. Placebo</b>   |                 |
|                              | <b>[N]</b>       | <b>MEAN (SD)</b> | <b>[N]</b>       | <b>MEAN (SD)</b> | <b>[N]</b>       | <b>MEAN (SD)</b> | <b>[N]</b>     | <b>MEAN (SD)</b> |                                               |                                |                                |                 |
| <b>Baseline</b>              | [21]             | 18.62 (6.73)     | [16]             | 20.24 (5.48)     | [19]             | 19.49 (5.19)     | [17]           | 21.39 (5.97)     | <b>Mean Difference (SE)</b>                   | -0.35 (1.05)                   | -0.12 (0.90)                   | 0.08 (1.01)     |
| <b>12 Month</b>              | [21]             | 17.72 (6.03)     | [16]             | 19.58 (5.98)     | [19]             | 19.03 (6.34)     | [17]           | 20.84 (5.58)     | <b>ANCOVA adjusted for Baseline (p-value)</b> | 0.350                          | 0.804                          | 0.963           |
| <b>Delta</b>                 | [21]             | -0.90 (3.34)     | [16]             | -0.66 (1.90)     | [19]             | -0.46 (2.90)     | [17]           | -0.55 (3.14)     | <b>95% Confidence Interval</b>                | -2.491 to 1.784                | -1.958 to 1.725                | -1.976 to 2.137 |
| <b>Within group p-value</b>  |                  | 0.231            |                  | 0.183            |                  | 0.494            |                | 0.484            |                                               |                                |                                |                 |
|                              |                  |                  |                  |                  |                  |                  |                |                  | <b>MSC + CPC vs. CPCs Only</b>                | <b>MSC + CPC vs. MSCs Only</b> | <b>MSCs Only vs. CPCs Only</b> |                 |
|                              |                  |                  |                  |                  |                  |                  |                |                  | <b>Mean Difference (SE)</b>                   | -0.43 (0.99)                   | -0.24 (0.87)                   | 0.20 (0.82)     |
|                              |                  |                  |                  |                  |                  |                  |                |                  | <b>ANCOVA adjusted for Baseline (p-value)</b> | 0.591                          | 0.618                          | 0.777           |
|                              |                  |                  |                  |                  |                  |                  |                |                  | <b>95% Confidence Interval</b>                | -2.431 to 1.562                | -2.006 to 1.532                | -1.468 to 1.863 |
| <b>Scar Tissue Mass (g)</b>  |                  |                  |                  |                  |                  |                  |                |                  |                                               |                                |                                |                 |
|                              | <b>MSC + CPC</b> |                  | <b>MSCs only</b> |                  | <b>CPCs only</b> |                  | <b>Placebo</b> |                  | <b>MSC + CPC vs. Placebo</b>                  | <b>MSCs Only vs. Placebo</b>   | <b>CPCs Only vs. Placebo</b>   |                 |
|                              | <b>[N]</b>       | <b>MEAN (SD)</b> | <b>[N]</b>       | <b>MEAN (SD)</b> | <b>[N]</b>       | <b>MEAN (SD)</b> | <b>[N]</b>     | <b>MEAN (SD)</b> |                                               |                                |                                |                 |
| <b>Baseline</b>              | [21]             | 31.37 (11.05)    | [16]             | 30.67 (11.30)    | [19]             | 33.30 (10.91)    | [17]           | 34.55 (10.92)    | <b>Mean Difference (SE)</b>                   | 0.52 (1.78)                    | 1.04 (1.48)                    | 0.82 (1.84)     |
| <b>12 Month</b>              | [21]             | 30.24 (11.13)    | [16]             | 30.06 (11.08)    | [19]             | 32.47 (12.85)    | [17]           | 32.90 (9.74)     | <b>ANCOVA adjusted for Baseline (p-value)</b> | 0.994                          | 0.725                          | 0.699           |
| <b>Delta</b>                 | [21]             | -1.13 (5.78)     | [16]             | -0.61 (3.10)     | [19]             | -0.83 (5.87)     | [17]           | -1.65 (5.17)     | <b>95% Confidence Interval</b>                | -3.092 to 4.130                | -1.989 to 4.071                | -2.92 to 4.562  |
| <b>Within group p-value</b>  |                  | 0.381            |                  | 0.445            |                  | 0.546            |                | 0.207            |                                               |                                |                                |                 |
|                              |                  |                  |                  |                  |                  |                  |                |                  | <b>MSC + CPC vs. CPCs Only</b>                | <b>MSC + CPC vs. MSCs Only</b> | <b>MSCs Only vs. CPCs Only</b> |                 |
|                              |                  |                  |                  |                  |                  |                  |                |                  | <b>Mean Difference (SE)</b>                   | -0.30 (1.85)                   | -0.52 (1.48)                   | -0.22 (1.55)    |
|                              |                  |                  |                  |                  |                  |                  |                |                  | <b>ANCOVA adjusted for Baseline (p-value)</b> | 0.835                          | 0.776                          | 0.897           |
|                              |                  |                  |                  |                  |                  |                  |                |                  | <b>95% Confidence Interval</b>                | -4.039 to 3.436                | -3.539 to 2.496                | -3.401 to 2.962 |

| <b>Functional Capacity</b>             |                  |                |                  |                |                  |                 |                |                 |                                               |                                |                                |                   |
|----------------------------------------|------------------|----------------|------------------|----------------|------------------|-----------------|----------------|-----------------|-----------------------------------------------|--------------------------------|--------------------------------|-------------------|
| <b>Peak V0<sub>2</sub> (ml/kg/min)</b> |                  |                |                  |                |                  |                 |                |                 |                                               |                                |                                |                   |
|                                        | <b>MSC + CPC</b> |                | <b>MSCs only</b> |                | <b>CPCs only</b> |                 | <b>Placebo</b> |                 | <b>MSC + CPC vs. Placebo</b>                  | <b>MSCs Only vs. Placebo</b>   | <b>CPCs Only vs. Placebo</b>   |                   |
|                                        | [N]              | MEAN (SD)      | [N]              | MEAN (SD)      | [N]              | MEAN (SD)       | [N]            | MEAN (SD)       |                                               |                                |                                |                   |
| <b>Baseline</b>                        | [27]             | 16.98 (5.13)   | [21]             | 17.36 (5.02)   | [22]             | 15.94 (4.42)    | [21]           | 17.19 (4.70)    | <b>Mean Difference (SE)</b>                   | -0.55 (0.94)                   | 1.31 (0.87)                    | 0.99 (0.95)       |
| <b>12 Month</b>                        | [27]             | 15.78 (5.13)   | [21]             | 18.02 (4.47)   | [22]             | 16.28 (6.08)    | [21]           | 16.54 (4.79)    | <b>ANCOVA adjusted for Baseline (p-value)</b> | 0.515                          | 0.107                          | 0.317             |
| <b>Delta</b>                           | [27]             | -1.20 (3.26)   | [21]             | 0.66 (2.39)    | [22]             | 0.34 (3.03)     | [21]           | -0.65 (3.20)    | <b>95% Confidence Interval</b>                | -2.441 to 1.344                | -0.449 to 3.078                | -0.926 to 2.914   |
| <b>Within group p-value</b>            | 0.067            |                | 0.218            |                | 0.603            |                 | 0.361          |                 |                                               |                                |                                |                   |
|                                        |                  |                |                  |                |                  |                 |                |                 | <b>MSC + CPC vs. CPCs Only</b>                | <b>MSC + CPC vs. MSCs Only</b> | <b>MSCs Only vs. CPCs Only</b> |                   |
|                                        |                  |                |                  |                |                  |                 |                |                 | <b>Mean Difference (SE)</b>                   | -1.54 (0.90)                   | -1.86 (0.82)                   | -0.32 (0.83)      |
|                                        |                  |                |                  |                |                  |                 |                |                 | <b>ANCOVA adjusted for Baseline (p-value)</b> | 0.112                          | 0.019                          | 0.681             |
|                                        |                  |                |                  |                |                  |                 |                |                 | <b>95% Confidence Interval</b>                | -3.356 to 0.271                | -3.506 to -0.220               | -1.997 to 1.356   |
| <b>Exercise Tolerance - 6 MWT (m)</b>  |                  |                |                  |                |                  |                 |                |                 |                                               |                                |                                |                   |
|                                        | <b>MSC + CPC</b> |                | <b>MSCs only</b> |                | <b>CPCs only</b> |                 | <b>Placebo</b> |                 | <b>MSC + CPC vs. Placebo</b>                  | <b>MSCs Only vs. Placebo</b>   | <b>CPCs Only vs. Placebo</b>   |                   |
|                                        | [N]              | MEAN (SD)      | [N]              | MEAN (SD)      | [N]              | MEAN (SD)       | [N]            | MEAN (SD)       |                                               |                                |                                |                   |
| <b>Baseline</b>                        | [28]             | 370.79 (81.55) | [20]             | 371.18 (94.88) | [23]             | 381.59 (90.91)  | [21]           | 385.17 (96.00)  | <b>Mean Difference (SE)</b>                   | 26.57 (17.26)                  | 29.49 (17.44)                  | 10.35 (17.07)     |
| <b>12 Month</b>                        | [28]             | 397.07 (87.66) | [20]             | 400.38 (98.55) | [23]             | 391.65 (102.56) | [21]           | 384.88 (101.69) | <b>ANCOVA adjusted for Baseline (p-value)</b> | 0.177                          | 0.116                          | 0.563             |
| <b>Delta</b>                           | [28]             | 26.29 (67.60)  | [20]             | 29.20 (58.19)  | [23]             | 10.07 (60.05)   | [21]           | -0.29 (53.19)   | <b>95% Confidence Interval</b>                | -8.157 to 61.299               | -5.806 to 64.777               | -24.105 to 44.807 |
| <b>Within group p-value</b>            | 0.049            |                | 0.037            |                | 0.430            |                 | 0.981          |                 |                                               |                                |                                |                   |
|                                        |                  |                |                  |                |                  |                 |                |                 | <b>MSC + CPC vs. CPCs Only</b>                | <b>MSC + CPC vs. MSCs Only</b> | <b>MSCs Only vs. CPCs Only</b> |                   |
|                                        |                  |                |                  |                |                  |                 |                |                 | <b>Mean Difference (SE)</b>                   | 16.22 (17.89)                  | -2.91 (18.24)                  | -19.13 (18.06)    |
|                                        |                  |                |                  |                |                  |                 |                |                 | <b>ANCOVA adjusted for Baseline (p-value)</b> | 0.425                          | 0.870                          | 0.326             |
|                                        |                  |                |                  |                |                  |                 |                |                 | <b>95% Confidence Interval</b>                | -19.734 to 52.175              | -39.659 to 33.831              | -55.618 to 17.348 |

| Functional Capacity  |           |                 |           |                 |           |                 |         |                   |                                        |                         |                         |                   |
|----------------------|-----------|-----------------|-----------|-----------------|-----------|-----------------|---------|-------------------|----------------------------------------|-------------------------|-------------------------|-------------------|
| MLHFQ Summary Score  |           |                 |           |                 |           |                 |         |                   |                                        |                         |                         |                   |
|                      | MSC + CPC |                 | MSCs only |                 | CPCs only |                 | Placebo |                   | MSC + CPC vs. Placebo                  | MSCs Only vs. Placebo   | CPCs Only vs. Placebo   |                   |
|                      | [N]       | MEAN (SD)       | [N]       | MEAN (SD)       | [N]       | MEAN (SD)       | [N]     | MEAN (SD)         |                                        |                         |                         |                   |
| Baseline             | [29]      | 40.75 (23.75)   | [22]      | 50.77 (24.04)   | [25]      | 29.46 (23.58)   | [25]    | 40.60 (25.46)     | Mean Difference (SE)                   | -11.35 (6.71)           | -16.70 (7.96)           | 0.27 (6.73)       |
| 12 Month             | [29]      | 25.35 (15.77)   | [22]      | 30.02 (19.67)   | [25]      | 25.68 (19.02)   | [25]    | 36.55 (21.13)     | ANCOVA adjusted for Baseline (p-value) | 0.020                   | 0.134                   | 0.204             |
| Delta                | [29]      | -15.40 (22.90)  | [22]      | -20.75 (28.30)  | [25]      | -3.78 (21.37)   | [25]    | -4.05 (25.97)     | 95% Confidence Interval                | -24.841 to 2.146        | -32.754 to -0.642       | -13.264 to 13.808 |
| Within group p-value | 0.001     |                 | 0.002     |                 | 0.385     |                 | 0.443   |                   |                                        |                         |                         |                   |
|                      |           |                 |           |                 |           |                 |         |                   | MSC + CPC vs. CPCs Only                | MSC + CPC vs. MSCs Only | MSCs Only vs. CPCs Only |                   |
|                      |           |                 |           |                 |           |                 |         |                   | Mean Difference (SE)                   | -11.62 (6.03)           | 5.35 (7.38)             | 16.97 (7.39)      |
|                      |           |                 |           |                 |           |                 |         |                   | ANCOVA adjusted for Baseline (p-value) | 0.362                   | 0.598                   | 0.771             |
|                      |           |                 |           |                 |           |                 |         |                   | 95% Confidence Interval                | -23.72 to 0.481         | -9.574 to 20.274        | 2.01 to 31.929    |
| Biomarkers           |           |                 |           |                 |           |                 |         |                   |                                        |                         |                         |                   |
| NT-proBNP (pg/ml)*   |           |                 |           |                 |           |                 |         |                   |                                        |                         |                         |                   |
|                      | MSC + CPC |                 | MSCs only |                 | CPCs only |                 | Placebo |                   | MSC + CPC vs. Placebo                  | MSCs Only vs. Placebo   | CPCs Only vs. Placebo   |                   |
|                      | [N]       | MEAN (SD)       | [N]       | MEAN (SD)       | [N]       | MEAN (SD)       | [N]     | MEAN (SD)         |                                        |                         |                         |                   |
| Baseline             | [28]      | 567.49 (528.86) | [21]      | 437.48 (652.88) | [23]      | 833.03 (798.86) | [23]    | 726.30 (1460.23)  | Mean Difference (SE)                   | -220 (232.3)            | -202.7 (230.5)          | -263.9 (240.2)    |
| 12 Month             | [28]      | 693.48 (768.85) | [21]      | 580.81 (756.89) | [23]      | 915.15 (757.94) | [23]    | 1072.32 (2161.64) | ANCOVA adjusted for Baseline (p-value) | 0.404                   | 0.654                   | 0.744             |
| Delta                | [28]      | 125.99 (550.26) | [21]      | 143.33 (457.79) | [23]      | 82.13 (578.44)  | [23]    | 346.01 (996.21)   | 95% Confidence Interval                | -692.8 to 252.7         | -672.5 to 267.1         | -751.4 to 223.6   |
| Within group p-value | 0.302     |                 | 0.172     |                 | 0.297     |                 | 0.123   |                   |                                        |                         |                         |                   |
|                      |           |                 |           |                 |           |                 |         |                   | MSC + CPC vs. CPCs Only                | MSC + CPC vs. MSCs Only | MSCs Only vs. CPCs Only |                   |
|                      |           |                 |           |                 |           |                 |         |                   | Mean Difference (SE)                   | 43.86 (159.3)           | -17.34 (144.2)          | -61.20 (156.6)    |
|                      |           |                 |           |                 |           |                 |         |                   | ANCOVA adjusted for Baseline (p-value) | 0.322                   | 0.656                   | 0.363             |
|                      |           |                 |           |                 |           |                 |         |                   | 95% Confidence Interval                | -276.7 to 364.4         | -307.5 to 272.8         | -377.4 to 255     |

\*Log transformation for NT-proBNP; p-values were obtained from transformed data.

Data presented as [N] Mean (SD), unless otherwise indicated

ANCOVA model adjusted for baseline value of outcome

MSC=mesenchymal stromal cells, CPC=c-kit positive cardiac cells, LVEF=left ventricular ejection fraction, LVEDVI=left ventricular end diastolic volume index, LVESVI=left ventricular end systolic volume index, MLHFQ=Minnesota Living with Heart Failure Questionnaire, NT-proBNP= N-Terminal pro-Brain Natriuretic Peptide



**Supplemental Table 8. Trajectory Assessment (Intention To Treat)**

| LVEF (%)                      | MSCs + CPCs |       |         | MSCs     |       |         | CPCs     |       |         | Placebo  |       |         | Overall  |       |         |
|-------------------------------|-------------|-------|---------|----------|-------|---------|----------|-------|---------|----------|-------|---------|----------|-------|---------|
|                               | Estimate    | SE    | p-value | Estimate | SE    | p-value | Estimate | SE    | p-value | Estimate | SE    | p-value | Estimate | SE    | p-value |
| <b>Intercept</b>              | 28.793      | 1.468 | <.0001  | 28.841   | 1.243 | <.0001  | 25.600   | 1.123 | <.0001  | 29.714   | 1.153 | <.0001  | 29.009   | 1.139 | <.0001  |
| <b>Change per Six Months</b>  | 0.167       | 0.551 | 0.765   | 0.422    | 0.480 | 0.388   | 0.633    | 0.411 | 0.135   | -0.175   | 0.332 | 0.602   | 0.267    | 0.241 | 0.269   |
| <b>MSCs+CPCs (vs Placebo)</b> |             |       |         |          |       |         |          |       |         |          |       | -0.243  | 1.430    | 0.866 |         |
| <b>MSCs (vs Placebo)</b>      |             |       |         |          |       |         |          |       |         |          |       | 0.0891  | 1.515    | 0.953 |         |
| <b>CPCs (vs Placebo)</b>      |             |       |         |          |       |         |          |       |         |          |       | -2.565  | 1.487    | 0.087 |         |

| Global Circumferential Strain (%) | MSCs + CPCs |       |         | MSCs     |       |         | CPCs     |       |         | Placebo  |       |         | Overall  |       |         |
|-----------------------------------|-------------|-------|---------|----------|-------|---------|----------|-------|---------|----------|-------|---------|----------|-------|---------|
|                                   | Estimate    | SE    | p-value | Estimate | SE    | p-value | Estimate | SE    | p-value | Estimate | SE    | p-value | Estimate | SE    | p-value |
| <b>Intercept</b>                  | -8.918      | 0.610 | <.0001  | -7.778   | 0.752 | <.0001  | -8.634   | 0.825 | <.0001  | -10.214  | 0.947 | <.0001  | -9.060   | 0.684 | <.0001  |
| <b>Change per Six Months</b>      | 0.126       | 0.239 | 0.603   | -0.324   | 0.283 | 0.269   | 0.276    | 0.300 | 0.369   | 0.576    | 0.417 | 0.188   | 0.141    | 0.153 | 0.361   |
| <b>MSCs+CPCs (vs Placebo)</b>     |             |       |         |          |       |         |          |       |         |          |       | 0.005   | 0.776    | 0.995 |         |
| <b>MSCs (vs Placebo)</b>          |             |       |         |          |       |         |          |       |         |          |       | 0.176   | 0.851    | 0.837 |         |
| <b>CPCs (vs Placebo)</b>          |             |       |         |          |       |         |          |       |         |          |       | 0.838   | 0.802    | 0.300 |         |

| Regional Longitudinal Strain (%) | MSCs + CPCs |       |         | MSCs     |       |         | CPCs     |       |         | Placebo  |       |         | Overall  |       |         |
|----------------------------------|-------------|-------|---------|----------|-------|---------|----------|-------|---------|----------|-------|---------|----------|-------|---------|
|                                  | Estimate    | SE    | p-value | Estimate | SE    | p-value | Estimate | SE    | p-value | Estimate | SE    | p-value | Estimate | SE    | p-value |
| <b>Intercept</b>                 | -10.023     | 0.754 | <.0001  | -9.645   | 0.743 | <.0001  | -9.173   | 0.776 | <.0001  | -9.473   | 0.909 | <.0001  | -9.487   | 0.645 | <.0001  |
| <b>Change per Six Months</b>     | -0.084      | 0.287 | 0.772   | -0.385   | 0.350 | 0.287   | -0.325   | 0.323 | 0.325   | -0.288   | 0.360 | 0.435   | -0.267   | 0.164 | 0.107   |
| <b>MSCs+CPCs (vs Placebo)</b>    |             |       |         |          |       |         |          |       |         |          |       | -0.248  | 0.728    | 0.734 |         |
| <b>MSCs (vs Placebo)</b>         |             |       |         |          |       |         |          |       |         |          |       | -0.374  | 0.790    | 0.637 |         |
| <b>CPCs (vs Placebo)</b>         |             |       |         |          |       |         |          |       |         |          |       | 0.239   | 0.754    | 0.752 |         |

|                               | MSCs + CPCs |       |         | MSCs     |       |         | CPCs     |       |         | Placebo  |       |         | Overall  |       |         |
|-------------------------------|-------------|-------|---------|----------|-------|---------|----------|-------|---------|----------|-------|---------|----------|-------|---------|
| LVEDVI (mL/m2)                | Estimate    | SE    | p-value | Estimate | SE    | p-value | Estimate | SE    | p-value | Estimate | SE    | p-value | Estimate | SE    | p-value |
| Intercept                     | 126.940     | 5.515 | <.0001  | 127.410  | 6.969 | <.0001  | 129.220  | 5.565 | <.0001  | 122.530  | 6.383 | <.0001  | 125.050  | 5.821 | <.0001  |
| Change per Six Months         | 1.538       | 1.585 | 0.339   | 0.320    | 1.303 | 0.808   | 1.7964   | 1.393 | 0.208   | 1.862    | 1.980 | 0.355   | 1.395    | 0.829 | 0.095   |
| <b>MSCs+CPCs (vs Placebo)</b> |             |       |         |          |       |         |          |       |         |          |       | 2.162   | 7.693    | 0.779 |         |
| <b>MSCs (vs Placebo)</b>      |             |       |         |          |       |         |          |       |         |          |       | 0.607   | 8.143    | 0.941 |         |
| <b>CPCs (vs Placebo)</b>      |             |       |         |          |       |         |          |       |         |          |       | 6.146   | 7.996    | 0.444 |         |

|                               | MSCs + CPCs |       |         | MSCs     |       |         | CPCs     |       |         | Placebo  |       |         | Overall  |       |         |
|-------------------------------|-------------|-------|---------|----------|-------|---------|----------|-------|---------|----------|-------|---------|----------|-------|---------|
| LVESVI (mL/m2)                | Estimate    | SE    | p-value | Estimate | SE    | p-value | Estimate | SE    | p-value | Estimate | SE    | p-value | Estimate | SE    | p-value |
| Intercept                     | 91.317      | 4.828 | <.0001  | 92.278   | 6.231 | <.0001  | 95.586   | 4.737 | <.0001  | 87.832   | 6.024 | <.0001  | 90.005   | 5.185 | <.0001  |
| Change per Six Months         | 0.826       | 1.158 | 0.481   | -0.394   | 1.117 | 0.727   | 0.626    | 1.288 | 0.631   | 1.077    | 1.709 | 0.534   | 0.603    | 0.683 | 0.379   |
| <b>MSCs+CPCs (vs Placebo)</b> |             |       |         |          |       |         |          |       |         |          |       | 1.866   | 6.855    | 0.786 |         |
| <b>MSCs (vs Placebo)</b>      |             |       |         |          |       |         |          |       |         |          |       | 0.543   | 7.252    | 0.941 |         |
| <b>CPCs (vs Placebo)</b>      |             |       |         |          |       |         |          |       |         |          |       | 6.609   | 7.123    | 0.356 |         |

|                               | MSCs + CPCs |       |         | MSCs     |       |         | CPCs     |       |         | Placebo  |       |         | Overall  |       |         |
|-------------------------------|-------------|-------|---------|----------|-------|---------|----------|-------|---------|----------|-------|---------|----------|-------|---------|
| Sphericity (ml)               | Estimate    | SE    | p-value | Estimate | SE    | p-value | Estimate | SE    | p-value | Estimate | SE    | p-value | Estimate | SE    | p-value |
| Intercept                     | 0.555       | 0.019 | <.0001  | 0.561    | 0.021 | <.0001  | 0.561    | 0.020 | <.0001  | 0.549    | 0.043 | <.0001  | 0.550    | 0.021 | <.0001  |
| Change per Six Months         | 0.004       | 0.007 | 0.513   | -0.004   | 0.008 | 0.600   | 0.008    | 0.007 | 0.293   | 0.002    | 0.012 | 0.860   | 0.003    | 0.004 | 0.401   |
| <b>MSCs+CPCs (vs Placebo)</b> |             |       |         |          |       |         |          |       |         |          |       | 0.008   | 0.027    | 0.768 |         |
| <b>MSCs (vs Placebo)</b>      |             |       |         |          |       |         |          |       |         |          |       | -0.004  | 0.028    | 0.874 |         |
| <b>CPCs (vs Placebo)</b>      |             |       |         |          |       |         |          |       |         |          |       | 0.019   | 0.028    | 0.494 |         |

| Scar Size Percent (%)  | MSCs + CPCs |       |         | MSCs     |       |         | CPCs     |       |         | Placebo  |       |         | Overall  |       |         |
|------------------------|-------------|-------|---------|----------|-------|---------|----------|-------|---------|----------|-------|---------|----------|-------|---------|
|                        | Estimate    | SE    | p-value | Estimate | SE    | p-value | Estimate | SE    | p-value | Estimate | SE    | p-value | Estimate | SE    | p-value |
| Intercept              | 18.875      | 1.455 | <.0001  | 20.170   | 1.178 | <.0001  | 19.467   | 0.906 | <.0001  | 20.215   | 1.181 | <.0001  | 20.589   | 1.110 | <.0001  |
| Change per Six Months  | -0.341      | 0.314 | 0.286   | -0.290   | 0.231 | 0.221   | -0.427   | 0.306 | 0.174   | -0.013   | 0.340 | 0.971   | -0.244   | 0.158 | 0.126   |
| MSCs+CPCs (vs Placebo) |             |       |         |          |       |         |          |       |         |          |       | -1.925  | 1.503    | 0.203 |         |
| MSCs (vs Placebo)      |             |       |         |          |       |         |          |       |         |          |       | -0.585  | 1.587    | 0.713 |         |
| CPCs (vs Placebo)      |             |       |         |          |       |         |          |       |         |          |       | -1.214  | 1.527    | 0.428 |         |

| Scar Tissue Mass (g)   | MSCs + CPCs |       |         | MSCs     |       |         | CPCs     |       |         | Placebo  |       |         | Overall  |       |         |
|------------------------|-------------|-------|---------|----------|-------|---------|----------|-------|---------|----------|-------|---------|----------|-------|---------|
|                        | Estimate    | SE    | p-value | Estimate | SE    | p-value | Estimate | SE    | p-value | Estimate | SE    | p-value | Estimate | SE    | p-value |
| Intercept              | 32.267      | 2.514 | <.0001  | 29.929   | 2.474 | <.0001  | 32.040   | 1.828 | <.0001  | 33.769   | 2.334 | <.0001  | 33.718   | 2.135 | <.0001  |
| Change per Six Months  | -0.309      | 0.539 | 0.572   | -0.266   | 0.367 | 0.476   | -0.958   | 0.615 | 0.131   | -0.390   | 0.549 | 0.484   | -0.4200  | 0.281 | 0.139   |
| MSCs+CPCs (vs Placebo) |             |       |         |          |       |         |          |       |         |          |       | -1.423  | 2.906    | 0.625 |         |
| MSCs (vs Placebo)      |             |       |         |          |       |         |          |       |         |          |       | -3.532  | 3.068    | 0.252 |         |
| CPCs (vs Placebo)      |             |       |         |          |       |         |          |       |         |          |       | -1.769  | 2.951    | 0.550 |         |

| Peak V <sub>O</sub> <sub>2</sub> (ml/kg/min) | MSCs + CPCs |       |         | MSCs     |       |         | CPCs     |       |         | Placebo  |       |         | Overall  |       |         |
|----------------------------------------------|-------------|-------|---------|----------|-------|---------|----------|-------|---------|----------|-------|---------|----------|-------|---------|
|                                              | Estimate    | SE    | p-value | Estimate | SE    | p-value | Estimate | SE    | p-value | Estimate | SE    | p-value | Estimate | SE    | p-value |
| Intercept                                    | 17.398      | 1.254 | <.0001  | 16.115   | 1.053 | <.0001  | 16.084   | 0.811 | <.0001  | 16.570   | 1.191 | <.0001  | 16.920   | 0.999 | <.0001  |
| Change per Six Months                        | -0.711      | 0.352 | 0.055   | 0.632    | 0.275 | 0.034   | -0.165   | 0.325 | 0.617   | -0.093   | 0.369 | 0.799   | -0.133   | 0.184 | 0.472   |
| MSCs+CPCs (vs Placebo)                       |             |       |         |          |       |         |          |       |         |          |       | -0.566  | 1.307    | 0.666 |         |
| MSCs (vs Placebo)                            |             |       |         |          |       |         |          |       |         |          |       | 1.027   | 1.392    | 0.463 |         |
| CPCs (vs Placebo)                            |             |       |         |          |       |         |          |       |         |          |       | -0.575  | 1.324    | 0.666 |         |

|                               | MSCs + CPCs |        |         | MSCs     |        |         | CPCs     |        |         | Placebo  |        |         | Overall  |        |         |
|-------------------------------|-------------|--------|---------|----------|--------|---------|----------|--------|---------|----------|--------|---------|----------|--------|---------|
| Six Minute Walk Test (m)      | Estimate    | SE     | p-value | Estimate | SE     | p-value | Estimate | SE     | p-value | Estimate | SE     | p-value | Estimate | SE     | p-value |
| Intercept                     | 358.360     | 15.774 | <.0001  | 358.250  | 18.413 | <.0001  | 371.690  | 17.632 | <.0001  | 374.680  | 14.860 | <.0001  | 358.700  | 15.218 | <.0001  |
| Change per Six Months         | 9.996       | 5.558  | 0.082   | 11.434   | 5.531  | 0.048   | 6.776    | 6.192  | 0.283   | -4.248   | 5.215  | 0.422   | 6.544    | 2.882  | 0.025   |
| <b>MSCs+CPCs (vs Placebo)</b> |             |        |         |          |        |         |          |        |         |          |        | 4.742   | 20.624   | 0.819  |         |
| <b>MSCs (vs Placebo)</b>      |             |        |         |          |        |         |          |        |         |          |        | 8.530   | 21.322   | 0.690  |         |
| <b>CPCs (vs Placebo)</b>      |             |        |         |          |        |         |          |        |         |          |        | 12.660  | 20.970   | 0.547  |         |

|                               | MSCs + CPCs |       |         | MSCs     |       |         | CPCs     |       |         | Placebo  |       |         | Overall* |       |         |
|-------------------------------|-------------|-------|---------|----------|-------|---------|----------|-------|---------|----------|-------|---------|----------|-------|---------|
| MLHFQ                         | Estimate    | SE    | p-value | Estimate | SE    | p-value | Estimate | SE    | p-value | Estimate | SE    | p-value | Estimate | SE    | p-value |
| Intercept                     | 52.579      | 5.946 | <.0001  | 49.025   | 6.298 | <.0001  | 23.776   | 4.328 | <.0001  | 41.368   | 6.193 | <.0001  | 39.163   | 5.893 | <.0001  |
| Change per Six Months         | -9.258      | 2.079 | <.0001  | -7.295   | 2.746 | 0.013   | 0.776    | 1.731 | 0.657   | -2.378   | 2.357 | 0.321   | -1.437   | 2.298 | 0.533   |
| <b>MSCs+CPCs (vs Placebo)</b> |             |       |         |          |       |         |          |       |         |          |       | 9.727   | 8.237    | 0.240 |         |
| <b>MSCs (vs Placebo)</b>      |             |       |         |          |       |         |          |       |         |          |       | 12.635  | 8.561    | 0.143 |         |
| <b>CPCs (vs Placebo)</b>      |             |       |         |          |       |         |          |       |         |          |       | -10.700 | 8.396    | 0.205 |         |
| <b>MSCs+CPCs x change</b>     |             |       |         |          |       |         |          |       |         |          |       | -6.783  | 3.175    | 0.035 |         |
| <b>MSCs x change</b>          |             |       |         |          |       |         |          |       |         |          |       | -7.078  | 3.348    | 0.037 |         |
| <b>CPCs x change</b>          |             |       |         |          |       |         |          |       |         |          |       | 0.245   | 3.264    | 0.940 |         |

|                               | MSCs + CPCs |         |         | MSCs     |         |         | CPCs     |         |         | Placebo  |         |          | Overall  |         |         |
|-------------------------------|-------------|---------|---------|----------|---------|---------|----------|---------|---------|----------|---------|----------|----------|---------|---------|
| NT-ProBNP (pg/ml)†            | Estimate    | SE      | p-value | Estimate | SE      | p-value | Estimate | SE      | p-value | Estimate | SE      | p-value  | Estimate | SE      | p-value |
| Intercept                     | 432.050     | 168.340 | <.0001  | 455.890  | 119.830 | <.0001  | 658.670  | 162.580 | <.0001  | 736.980  | 204.770 | <.0001   | 1106.430 | 244.070 | <.0001  |
| Change per Six Months         | 74.650      | 72.303  | 0.421   | 102.250  | 46.194  | 0.081   | 61.680   | 57.365  | 0.486   | 185.210  | 99.190  | 0.413    | 84.557   | 35.810  | 0.092   |
| <b>MSCs+CPCs (vs Placebo)</b> |             |         |         |          |         |         |          |         |         |          |         | -484.200 | 334.830  | 0.456   |         |
| <b>MSCs (vs Placebo)</b>      |             |         |         |          |         |         |          |         |         |          |         | -659.630 | 352.480  | 0.196   |         |
| <b>CPCs (vs Placebo)</b>      |             |         |         |          |         |         |          |         |         |          |         | -170.230 | 347.460  | 0.970   |         |

\*There were significant time treatment interactions for MLHFQ

†Log transformation for NT-proBNP; p-values were obtained from transformed data.

MSC=mesenchymal stromal cells, CPC=c-kit positive cardiac cells, LVEF=left ventricular ejection fraction, LVEDVI=left ventricular end diastolic volume index, LVESVI=left ventricular end systolic

volume index, MLHFQ=Minnesota Living with Heart Failure Questionnaire, NT-proBNP= N-Terminal pro-Brain Natriuretic Peptide

**Supplemental Table 9. Trajectory Assessment (As Treated)**

| LVEF (%)                 | MSCs + CPCs |       |         | MSCs     |       |         | CPCs     |       |         | Placebo  |       |         | Overall  |       |         |
|--------------------------|-------------|-------|---------|----------|-------|---------|----------|-------|---------|----------|-------|---------|----------|-------|---------|
|                          | Estimate    | SE    | p-value | Estimate | SE    | p-value | Estimate | SE    | p-value | Estimate | SE    | p-value | Estimate | SE    | p-value |
| Intercept                | 28.828      | 1.518 | <.0001  | 28.762   | 1.807 | <.0001  | 26.021   | 1.197 | <.0001  | 30.158   | 0.911 | <.0001  | 29.235   | 0.970 | <.0001  |
| Change per Six Months    | 0.237       | 0.399 | 0.559   | 0.546    | 0.797 | 0.501   | 0.624    | 0.402 | 0.132   | -0.250   | 0.256 | 0.335   | 0.250    | 0.241 | 0.302   |
| MSCs + CPCs (vs Placebo) |             |       |         |          |       |         |          |       |         |          |       | -0.291  | 1.507    | 0.848 |         |
| MSCs (vs Placebo)        |             |       |         |          |       |         |          |       |         |          |       | 0.155   | 1.479    | 0.917 |         |
| CPCs (vs Placebo)        |             |       |         |          |       |         |          |       |         |          |       | -2.594  | 1.354    | 0.058 |         |

| Global Circumferential Strain (%) | MSCs + CPCs |       |         | MSCs     |       |         | CPCs     |       |         | Placebo  |       |         | Overall  |       |         |
|-----------------------------------|-------------|-------|---------|----------|-------|---------|----------|-------|---------|----------|-------|---------|----------|-------|---------|
|                                   | Estimate    | SE    | p-value | Estimate | SE    | p-value | Estimate | SE    | p-value | Estimate | SE    | p-value | Estimate | SE    | p-value |
| Intercept                         | -9.786      | 0.690 | <.0001  | -8.452   | 0.745 | <.0001  | -7.427   | 0.789 | <.0001  | -9.540   | 0.807 | <.0001  | -8.987   | 0.549 | <.0001  |
| Change per Six Months             | 0.479       | 0.246 | 0.071   | 0.079    | 0.328 | 0.813   | -0.258   | 0.300 | 0.400   | 0.406    | 0.295 | 0.180   | 0.137    | 0.155 | 0.381   |
| MSCs + CPCs (vs Placebo)          |             |       |         |          |       |         |          |       |         |          |       | -0.288  | 0.757    | 0.705 |         |
| MSCs (vs Placebo)                 |             |       |         |          |       |         |          |       |         |          |       | -0.090  | 0.791    | 0.910 |         |
| CPCs (vs Placebo)                 |             |       |         |          |       |         |          |       |         |          |       | 0.860   | 0.689    | 0.216 |         |

| Regional Longitudinal Strain (%) | MSCs + CPCs |       |         | MSCs     |       |         | CPCs     |       |         | Placebo  |       |         | Overall  |       |         |
|----------------------------------|-------------|-------|---------|----------|-------|---------|----------|-------|---------|----------|-------|---------|----------|-------|---------|
|                                  | Estimate    | SE    | p-value | Estimate | SE    | p-value | Estimate | SE    | p-value | Estimate | SE    | p-value | Estimate | SE    | p-value |
| Intercept                        | -10.933     | 0.895 | <.0001  | -10.847  | 0.654 | <.0001  | -8.371   | 0.869 | <.0001  | -9.223   | 0.620 | <.0001  | -9.562   | 0.524 | <.0001  |
| Change per Six Months            | 0.114       | 0.345 | 0.745   | 0.115    | 0.317 | 0.722   | -0.609   | 0.340 | 0.088   | -0.461   | 0.275 | 0.105   | -0.274   | 0.165 | 0.101   |
| MSCs + CPCs (vs Placebo)         |             |       |         |          |       |         |          |       |         |          |       | -0.755  | 0.717    | 0.296 |         |
| MSCs (vs Placebo)                |             |       |         |          |       |         |          |       |         |          |       | -0.280  | 0.733    | 0.703 |         |
| CPCs (vs Placebo)                |             |       |         |          |       |         |          |       |         |          |       | 0.640   | 0.651    | 0.329 |         |

|                          | MSCs + CPCs |       |         | MSCs     |       |         | CPCs     |        |         | Placebo  |       |         | Overall  |       |         |
|--------------------------|-------------|-------|---------|----------|-------|---------|----------|--------|---------|----------|-------|---------|----------|-------|---------|
| LVEDVI (mL/m2)           | Estimate    | SE    | p-value | Estimate | SE    | p-value | Estimate | SE     | p-value | Estimate | SE    | p-value | Estimate | SE    | p-value |
| Intercept                | 126.600     | 6.252 | <.0001  | 119.180  | 7.266 | <.0001  | 124.960  | 5.7210 | <.0001  | 125.670  | 5.277 | <.0001  | 126.620  | 4.753 | <.0001  |
| Change per Six Months    | 1.959       | 1.981 | 0.335   | 2.168    | 1.412 | 0.140   | 2.213    | 1.352  | 0.113   | 1.500    | 1.559 | 0.342   | 1.542    | 0.831 | 0.066   |
| MSCs + CPCs (vs Placebo) |             |       |         |          |       |         |          |        |         |          |       | -0.233  | 7.896    | 0.977 |         |
| MSCs (vs Placebo)        |             |       |         |          |       |         |          |        |         |          |       | -6.489  | 7.750    | 0.404 |         |
| CPCs (vs Placebo)        |             |       |         |          |       |         |          |        |         |          |       | 2.873   | 7.092    | 0.686 |         |

|                          | MSCs + CPCs |       |         | MSCs     |       |         | CPCs     |       |         | Placebo  |       |         | Overall  |       |         |
|--------------------------|-------------|-------|---------|----------|-------|---------|----------|-------|---------|----------|-------|---------|----------|-------|---------|
| LVESVI (mL/m2)           | Estimate    | SE    | p-value | Estimate | SE    | p-value | Estimate | SE    | p-value | Estimate | SE    | p-value | Estimate | SE    | p-value |
| Intercept                | 91.095      | 5.702 | <.0001  | 86.148   | 6.616 | <.0001  | 91.716   | 4.860 | <.0001  | 89.357   | 4.749 | <.0001  | 90.768   | 4.224 | <.0001  |
| Change per Six Months    | 0.484       | 1.602 | 0.766   | 0.725    | 1.365 | 0.601   | 1.059    | 1.278 | 0.414   | 1.084    | 1.244 | 0.389   | 0.744    | 0.684 | 0.279   |
| MSCs + CPCs (vs Placebo) |             |       |         |          |       |         |          |       |         |          |       | -0.303  | 7.026    | 0.966 |         |
| MSCs (vs Placebo)        |             |       |         |          |       |         |          |       |         |          |       | -4.497  | 6.890    | 0.515 |         |
| CPCs (vs Placebo)        |             |       |         |          |       |         |          |       |         |          |       | 4.513   | 6.306    | 0.476 |         |

|                          | MSCs + CPCs |       |         | MSCs     |       |         | CPCs     |       |         | Placebo  |       |         | Overall  |       |         |
|--------------------------|-------------|-------|---------|----------|-------|---------|----------|-------|---------|----------|-------|---------|----------|-------|---------|
| Sphericity (ml)          | Estimate    | SE    | p-value | Estimate | SE    | p-value | Estimate | SE    | p-value | Estimate | SE    | p-value | Estimate | SE    | p-value |
| Intercept                | 0.545       | 0.024 | <.0001  | 0.550    | 0.025 | <.0001  | 0.571    | 0.020 | <.0001  | 0.558    | 0.030 | <.0001  | 0.557    | 0.018 | <.0001  |
| Change per Six Months    | 0.007       | 0.009 | 0.451   | -0.001   | 0.009 | 0.893   | 0.005    | 0.007 | 0.485   | 0.001    | 0.008 | 0.908   | 0.003    | 0.004 | 0.453   |
| MSCs + CPCs (vs Placebo) |             |       |         |          |       |         |          |       |         |          |       | -0.004  | 0.028    | 0.877 |         |
| MSCs (vs Placebo)        |             |       |         |          |       |         |          |       |         |          |       | -0.015  | 0.027    | 0.564 |         |
| CPCs (vs Placebo)        |             |       |         |          |       |         |          |       |         |          |       | 0.017   | 0.025    | 0.487 |         |

|                          | MSCs + CPCs |       |         | MSCs     |       |         | CPCs     |       |         | Placebo  |       |         | Overall  |       |         |
|--------------------------|-------------|-------|---------|----------|-------|---------|----------|-------|---------|----------|-------|---------|----------|-------|---------|
| Scar Size Percent (%)    | Estimate    | SE    | p-value | Estimate | SE    | p-value | Estimate | SE    | p-value | Estimate | SE    | p-value | Estimate | SE    | p-value |
| Intercept                | 17.995      | 1.981 | <.0001  | 18.369   | 0.929 | <.0001  | 20.297   | 0.986 | <.0001  | 20.136   | 1.022 | <.0001  | 20.342   | 0.929 | <.0001  |
| Change per Six Months    | -0.485      | 0.387 | 0.227   | -0.242   | 0.240 | 0.326   | -0.437   | 0.336 | 0.205   | -0.182   | 0.244 | 0.462   | -0.256   | 0.160 | 0.114   |
| MSCs + CPCs (vs Placebo) |             |       |         |          |       |         |          |       |         |          |       | -2.620  | 1.551    | 0.094 |         |
| MSCs (vs Placebo)        |             |       |         |          |       |         |          |       |         |          |       | -1.894  | 1.523    | 0.216 |         |
| CPCs (vs Placebo)        |             |       |         |          |       |         |          |       |         |          |       | -0.275  | 1.402    | 0.845 |         |

|                          | MSCs + CPCs |       |         | MSCs     |       |         | CPCs     |       |         | Placebo  |       |         | Overall  |       |         |
|--------------------------|-------------|-------|---------|----------|-------|---------|----------|-------|---------|----------|-------|---------|----------|-------|---------|
| Scar Tissue Mass (g)     | Estimate    | SE    | p-value | Estimate | SE    | p-value | Estimate | SE    | p-value | Estimate | SE    | p-value | Estimate | SE    | p-value |
| Intercept                | 29.564      | 3.381 | <.0001  | 27.967   | 2.043 | <.0001  | 33.837   | 1.874 | <.0001  | 32.454   | 1.963 | <.0001  | 32.706   | 1.783 | <.0001  |
| Change per Six Months    | -0.424      | 0.604 | 0.491   | -0.452   | 0.423 | 0.299   | -1.006   | 0.662 | 0.141   | -0.339   | 0.412 | 0.416   | -0.416   | 0.282 | 0.143   |
| MSCs + CPCs (vs Placebo) |             |       |         |          |       |         |          |       |         |          |       | -2.750  | 3.013    | 0.363 |         |
| MSCs (vs Placebo)        |             |       |         |          |       |         |          |       |         |          |       | -4.399  | 2.958    | 0.140 |         |
| CPCs (vs Placebo)        |             |       |         |          |       |         |          |       |         |          |       | 0.800   | 2.725    | 0.770 |         |

|                                              | MSCs + CPCs |       |         | MSCs     |       |         | CPCs     |       |         | Placebo  |       |         | Overall  |       |         |
|----------------------------------------------|-------------|-------|---------|----------|-------|---------|----------|-------|---------|----------|-------|---------|----------|-------|---------|
| Peak V <sub>O</sub> <sub>2</sub> (ml/kg/min) | Estimate    | SE    | p-value | Estimate | SE    | p-value | Estimate | SE    | p-value | Estimate | SE    | p-value | Estimate | SE    | p-value |
| Intercept                                    | 17.942      | 1.562 | <.0001  | 15.511   | 1.338 | <.0001  | 17.379   | 1.055 | <.0001  | 16.883   | 0.889 | <.0001  | 16.676   | 0.849 | <.0001  |
| Change per Six Months                        | -0.949      | 0.505 | 0.081   | 0.884    | 0.310 | 0.015   | -0.140   | 0.331 | 0.678   | -0.258   | 0.253 | 0.316   | -0.151   | 0.185 | 0.418   |
| MSCs + CPCs (vs Placebo)                     |             |       |         |          |       |         |          |       |         |          |       | -0.239  | 1.385    | 0.864 |         |
| MSCs (vs Placebo)                            |             |       |         |          |       |         |          |       |         |          |       | 1.180   | 1.457    | 0.420 |         |
| CPCs (vs Placebo)                            |             |       |         |          |       |         |          |       |         |          |       | 0.972   | 1.252    | 0.440 |         |

|                                 | MSCs + CPCs |        |         | MSCs     |        |         | CPCs     |        |         | Placebo  |        |         | Overall  |        |         |
|---------------------------------|-------------|--------|---------|----------|--------|---------|----------|--------|---------|----------|--------|---------|----------|--------|---------|
| Six Minute Walk Test (m)        | Estimate    | SE     | p-value | Estimate | SE     | p-value | Estimate | SE     | p-value | Estimate | SE     | p-value | Estimate | SE     | p-value |
| Intercept                       | 362.480     | 21.904 | <.0001  | 351.360  | 19.632 | <.0001  | 382.990  | 17.464 | <.0001  | 366.180  | 15.149 | <.0001  | 358.330  | 13.871 | <.0001  |
| Change per Six Months           | 5.846       | 7.762  | 0.461   | 11.707   | 6.191  | 0.073   | 8.572    | 5.922  | 0.159   | 1.662    | 4.357  | 0.705   | 6.711    | 2.923  | 0.024   |
| <b>MSCs + CPCs (vs Placebo)</b> |             |        |         |          |        |         |          |        |         |          |        | 4.865   | 23.114   | 0.834  |         |
| <b>MSCs (vs Placebo)</b>        |             |        |         |          |        |         |          |        |         |          |        | 1.244   | 22.728   | 0.956  |         |
| <b>CPCs (vs Placebo)</b>        |             |        |         |          |        |         |          |        |         |          |        | 26.282  | 20.768   | 0.209  |         |

|                                 | MSCs + CPCs |       |         | MSCs     |       |         | CPCs     |       |         | Placebo  |       |         | Overall* |       |         |
|---------------------------------|-------------|-------|---------|----------|-------|---------|----------|-------|---------|----------|-------|---------|----------|-------|---------|
| MLHFQ                           | Estimate    | SE    | p-value | Estimate | SE    | p-value | Estimate | SE    | p-value | Estimate | SE    | p-value | Estimate | SE    | p-value |
| Intercept                       | 40.928      | 7.642 | <.0001  | 59.490   | 7.694 | <.0001  | 27.828   | 4.491 | <.0001  | 41.982   | 5.329 | <.0001  | 39.889   | 5.130 | <.0001  |
| Change per Six Months           | -6.996      | 2.711 | 0.018   | -10.599  | 3.198 | 0.004   | -0.882   | 1.778 | 0.624   | -3.187   | 2.024 | 0.123   | -2.434   | 1.977 | 0.221   |
| <b>MSCs + CPCs (vs Placebo)</b> |             |       |         |          |       |         |          |       |         |          |       | 1.359   | 8.948    | 0.880 |         |
| <b>MSCs (vs Placebo)</b>        |             |       |         |          |       |         |          |       |         |          |       | 19.141  | 8.834    | 0.033 |         |
| <b>CPCs (vs Placebo)</b>        |             |       |         |          |       |         |          |       |         |          |       | -8.495  | 8.039    | 0.293 |         |
| <b>MSCs + CPCs x change</b>     |             |       |         |          |       |         |          |       |         |          |       | -3.839  | 3.439    | 0.267 |         |
| <b>MSCs x change</b>            |             |       |         |          |       |         |          |       |         |          |       | -8.162  | 3.414    | 0.019 |         |
| <b>CPCs x change</b>            |             |       |         |          |       |         |          |       |         |          |       | 0.036   | 3.078    | 0.991 |         |

|                                | MSCs + CPCs |         |         | MSCs     |         |         | CPCs     |         |         | Placebo  |         |          | Overall  |         |         |
|--------------------------------|-------------|---------|---------|----------|---------|---------|----------|---------|---------|----------|---------|----------|----------|---------|---------|
| NT-ProBNP (pg/ml)†             | Estimate    | SE      | p-value | Estimate | SE      | p-value | Estimate | SE      | p-value | Estimate | SE      | p-value  | Estimate | SE      | p-value |
| Intercept                      | 360.290     | 420.890 | <.0001  | 340.120  | 123.010 | <.0001  | 651.470  | 163.990 | <.0001  | 645.590  | 158.650 | <.0001   | 1159.780 | 287.700 | <.0001  |
| Change per Six Months          | 84.186      | 186.430 | 0.793   | 121.350  | 56.050  | 0.068   | 56.627   | 52.958  | 0.464   | 138.200  | 73.237  | 0.253    | -23.347  | 80.311  | 0.089   |
| <b>MSCs +CPCs (vs Placebo)</b> |             |         |         |          |         |         |          |         |         |          |         | -247.820 | 346.010  | 0.902   |         |
| <b>MSCs (vs Placebo)</b>       |             |         |         |          |         |         |          |         |         |          |         | -451.160 | 341.590  | 0.129   |         |
| <b>CPCs (vs Placebo)</b>       |             |         |         |          |         |         |          |         |         |          |         | -232.000 | 311.210  | 0.913   |         |

\*There were significant time treatment interactions for MLHFQ

†Log transformation for NT-proBNP; p-values were obtained from transformed data.

MSC=mesenchymal stromal cells, CPC=c-kit positive cardiac cells, LVEF=left ventricular ejection fraction, LVEDVI=left ventricular end diastolic volume index, LVESVI=left ventricular end systolic volume index, MLHFQ=Minnesota Living with Heart Failure Questionnaire, NT-proBNP= N-Terminal pro-Brain Natriuretic Peptide



**Supplemental Table 10. Endpoint Analysis for Baseline to 6 Month (As Treated)**

| Function                          |           |              |           |              |           |              |         |              |                                        |                         |                         |                 |
|-----------------------------------|-----------|--------------|-----------|--------------|-----------|--------------|---------|--------------|----------------------------------------|-------------------------|-------------------------|-----------------|
| LVEF (%)                          |           |              |           |              |           |              |         |              |                                        |                         |                         |                 |
|                                   | MSC + CPC |              | MSCs only |              | CPCs only |              | Placebo |              | MSC + CPC vs. Placebo                  | MSCs Only vs. Placebo   | CPCs Only vs. Placebo   |                 |
|                                   | [N]       | MEAN (SD)    | [N]       | MEAN (SD)    | [N]       | MEAN (SD)    | [N]     | MEAN (SD)    |                                        |                         |                         |                 |
| Baseline                          | [17]      | 29.94 (6.44) | [20]      | 29.45 (6.55) | [26]      | 26.73 (5.58) | [36]    | 29.55 (5.73) | Mean Difference (SE)                   | -0.19 (0.96)            | 0.75 (1.08)             | 0.68 (0.93)     |
| 6 Month                           | [17]      | 29.61 (6.28) | [20]      | 30.06 (6.75) | [26]      | 27.27 (6.06) | [36]    | 29.42 (4.78) | ANCOVA adjusted for Baseline (p-value) | 0.930                   | 0.460                   | 0.952           |
| Delta                             | [17]      | -0.33 (2.99) | [20]      | 0.61 (3.95)  | [26]      | 0.54 (3.50)  | [36]    | -0.14 (3.73) | 95% Confidence Interval                | -2.121 to 1.744         | -1.440 to 2.933         | -1.178 to 2.533 |
| Within group p-value              |           | 0.660        |           | 0.498        |           | 0.438        |         | 0.827        |                                        |                         |                         |                 |
|                                   |           |              |           |              |           |              |         |              | MSC + CPC vs. CPCs Only                | MSC + CPC vs. MSCs Only | MSCs Only vs. CPCs Only |                 |
|                                   |           |              |           |              |           |              |         |              | Mean Difference (SE)                   | -0.87 (1.00)            | -0.93 (1.14)            | -0.07 (1.12)    |
|                                   |           |              |           |              |           |              |         |              | ANCOVA adjusted for Baseline (p-value) | 0.649                   | 0.455                   | 0.709           |
|                                   |           |              |           |              |           |              |         |              | 95% Confidence Interval                | -2.890 to 1.157         | -3.256 to 1.387         | -2.333 to 2.197 |
| Global Circumferential Strain (%) |           |              |           |              |           |              |         |              |                                        |                         |                         |                 |
|                                   | MSC + CPC |              | MSCs only |              | CPCs only |              | Placebo |              | MSC + CPC vs. Placebo                  | MSCs Only vs. Placebo   | CPCs Only vs. Placebo   |                 |
|                                   | [N]       | MEAN (SD)    | [N]       | MEAN (SD)    | [N]       | MEAN (SD)    | [N]     | MEAN (SD)    |                                        |                         |                         |                 |
| Baseline                          | [16]      | -9.16 (2.58) | [14]      | -9.10 (2.52) | [22]      | -7.81 (2.73) | [28]    | -8.94 (3.48) | Mean Difference (SE)                   | -0.26 (1.07)            | 0.94 (0.88)             | 0.22 (0.84)     |
| 6 Month                           | [16]      | -9.42 (3.64) | [14]      | -8.16 (1.99) | [22]      | -7.59 (2.58) | [28]    | -8.94 (3.02) | ANCOVA adjusted for Baseline (p-value) | 0.684                   | 0.306                   | 0.237           |
| Delta                             | [16]      | -0.26 (3.32) | [14]      | 0.94 (2.09)  | [22]      | 0.22 (2.34)  | [28]    | -0.00 (3.57) | 95% Confidence Interval                | -2.435 to 1.917         | -0.829 to 2.715         | -1.466 to 1.913 |
| Within group p-value              |           | 0.756        |           | 0.116        |           | 0.663        |         | 0.996        |                                        |                         |                         |                 |
|                                   |           |              |           |              |           |              |         |              | MSC + CPC vs. CPCs Only                | MSC + CPC vs. MSCs Only | MSCs Only vs. CPCs Only |                 |
|                                   |           |              |           |              |           |              |         |              | Mean Difference (SE)                   | -0.48 (0.97)            | -1.20 (1.00)            | -0.72 (0.75)    |
|                                   |           |              |           |              |           |              |         |              | ANCOVA adjusted for Baseline (p-value) | 0.269                   | 0.216                   | 0.851           |
|                                   |           |              |           |              |           |              |         |              | 95% Confidence Interval                | -2.475 to 1.510         | -3.259 to 0.855         | -2.247 to 0.809 |

| Function                |           |                |           |                |           |                |         |                |                                        |                         |                         |                  |
|-------------------------|-----------|----------------|-----------|----------------|-----------|----------------|---------|----------------|----------------------------------------|-------------------------|-------------------------|------------------|
| Longitudinal Strain (%) |           |                |           |                |           |                |         |                |                                        |                         |                         |                  |
|                         | MSC + CPC |                | MSCs only |                | CPCs only |                | Placebo |                | MSC + CPC vs. Placebo                  | MSCs Only vs. Placebo   | CPCs Only vs. Placebo   |                  |
|                         | [N]       | MEAN (SD)      | [N]       | MEAN (SD)      | [N]       | MEAN (SD)      | [N]     | MEAN (SD)      |                                        |                         |                         |                  |
| Baseline                | [16]      | -10.98 (2.77)  | [15]      | -10.27 (2.25)  | [22]      | -8.92 (2.86)   | [29]    | -9.70 (2.52)   | Mean Difference (SE)                   | 0.05 (0.74)             | -0.31 (0.69)            | -0.90 (0.71)     |
| 6 Month                 | [16]      | -11.31 (3.40)  | [15]      | -10.94 (2.34)  | [22]      | -10.19 (2.77)  | [29]    | -10.07 (2.96)  | ANCOVA adjusted for Baseline (p-value) | 0.748                   | 0.499                   | 0.365            |
| Delta                   | [16]      | -0.32 (2.26)   | [15]      | -0.68 (1.95)   | [22]      | -1.27 (2.49)   | [29]    | -0.37 (2.56)   | 95% Confidence Interval                | -1.457 to 1.547         | -1.714 to 1.098         | -2.338 to 0.530  |
| Within group p-value    |           | 0.577          |           | 0.201          |           | 0.026          |         | 0.446          |                                        |                         |                         |                  |
|                         |           |                |           |                |           |                |         |                | MSC + CPC vs. CPCs Only                | MSC + CPC vs. MSCs Only | MSCs Only vs. CPCs Only |                  |
|                         |           |                |           |                |           |                |         |                | Mean Difference (SE)                   | 0.95 (0.78)             | 0.35 (0.76)             | -0.60 (0.73)     |
|                         |           |                |           |                |           |                |         |                | ANCOVA adjusted for Baseline (p-value) | 0.642                   | 0.770                   | 0.919            |
|                         |           |                |           |                |           |                |         |                | 95% Confidence Interval                | -0.626 to 2.524         | -1.196 to 1.903         | -2.081 to 0.890  |
| Structure               |           |                |           |                |           |                |         |                |                                        |                         |                         |                  |
| LVEDVI (mL/m2)          |           |                |           |                |           |                |         |                |                                        |                         |                         |                  |
|                         | MSC + CPC |                | MSCs only |                | CPCs only |                | Placebo |                | MSC + CPC vs. Placebo                  | MSCs Only vs. Placebo   | CPCs Only vs. Placebo   |                  |
|                         | [N]       | MEAN (SD)      | [N]       | MEAN (SD)      | [N]       | MEAN (SD)      | [N]     | MEAN (SD)      |                                        |                         |                         |                  |
| Baseline                | [17]      | 130.09 (28.38) | [20]      | 121.64 (32.63) | [26]      | 130.96 (29.79) | [36]    | 127.72 (29.86) | Mean Difference (SE)                   | -6.23 (4.63)            | -0.55 (3.21)            | -5.68 (3.16)     |
| 6 Month                 | [17]      | 127.52 (29.93) | [20]      | 124.75 (31.66) | [26]      | 128.94 (26.78) | [36]    | 131.38 (29.61) | ANCOVA adjusted for Baseline (p-value) | 0.155                   | 0.738                   | 0.093            |
| Delta                   | [17]      | -2.58 (16.93)  | [20]      | 3.11 (10.71)   | [26]      | -2.02 (11.86)  | [36]    | 3.66 (12.88)   | 95% Confidence Interval                | -15.773 to 3.305        | -7.023 to 5.922         | -12.014 to 0.662 |
| Within group p-value    |           | 0.539          |           | 0.210          |           | 0.394          |         | 0.097          |                                        |                         |                         |                  |
|                         |           |                |           |                |           |                |         |                | MSC + CPC vs. CPCs Only                | MSC + CPC vs. MSCs Only | MSCs Only vs. CPCs Only |                  |
|                         |           |                |           |                |           |                |         |                | Mean Difference (SE)                   | -0.56 (4.72)            | -5.68 (4.75)            | -5.13 (3.34)     |
|                         |           |                |           |                |           |                |         |                | ANCOVA adjusted for Baseline (p-value) | 0.870                   | 0.297                   | 0.234            |
|                         |           |                |           |                |           |                |         |                | 95% Confidence Interval                | -10.254 to 9.138        | -15.450 to 4.082        | -11.858 to 1.606 |

| Structure            |           |               |           |               |           |               |         |               |                                        |                         |                         |                  |
|----------------------|-----------|---------------|-----------|---------------|-----------|---------------|---------|---------------|----------------------------------------|-------------------------|-------------------------|------------------|
| LVESVI (mL/m2)       |           |               |           |               |           |               |         |               |                                        |                         |                         |                  |
|                      | MSC + CPC |               | MSCs only |               | CPCs only |               | Placebo |               | MSC + CPC vs. Placebo                  | MSCs Only vs. Placebo   | CPCs Only vs. Placebo   |                  |
|                      | [N]       | MEAN (SD)     | [N]       | MEAN (SD)     | [N]       | MEAN (SD)     | [N]     | MEAN (SD)     |                                        |                         |                         |                  |
| Baseline             | [17]      | 92.17 (26.07) | [20]      | 87.05 (29.48) | [26]      | 96.87 (27.19) | [36]    | 90.97 (27.00) | Mean Difference (SE)                   | -4.13 (3.19)            | -0.99 (3.01)            | -5.00 (2.73)     |
| 6 Month              | [17]      | 90.59 (25.90) | [20]      | 88.61 (28.50) | [26]      | 94.41 (24.17) | [36]    | 93.52 (25.80) | ANCOVA adjusted for Baseline (p-value) | 0.198                   | 0.622                   | 0.113            |
| Delta                | [17]      | -1.58 (10.90) | [20]      | 1.56 (10.89)  | [26]      | -2.45 (10.58) | [36]    | 2.55 (10.66)  | 95% Confidence Interval                | -10.632 to 2.366        | -7.091 to 5.108         | -10.481 to 0.474 |
| Within group p-value | 0.558     |               | 0.530     |               | 0.248     |               | 0.160   |               |                                        |                         |                         |                  |
|                      |           |               |           |               |           |               |         |               | MSC + CPC vs. CPCs Only                | MSC + CPC vs. MSCs Only | MSCs Only vs. CPCs Only |                  |
|                      |           |               |           |               |           |               |         |               | Mean Difference (SE)                   | 0.87 (3.36)             | -3.14 (3.59)            | -4.01 (3.20)     |
|                      |           |               |           |               |           |               |         |               | ANCOVA adjusted for Baseline (p-value) | 0.956                   | 0.462                   | 0.395            |
|                      |           |               |           |               |           |               |         |               | 95% Confidence Interval                | -5.964 to 7.705         | -10.447 to 4.163        | -10.477 to 2.452 |
| Sphericity (ml)      |           |               |           |               |           |               |         |               |                                        |                         |                         |                  |
|                      | MSC + CPC |               | MSCs only |               | CPCs only |               | Placebo |               | MSC + CPC vs. Placebo                  | MSCs Only vs. Placebo   | CPCs Only vs. Placebo   |                  |
|                      | [N]       | MEAN (SD)     | [N]       | MEAN (SD)     | [N]       | MEAN (SD)     | [N]     | MEAN (SD)     |                                        |                         |                         |                  |
| Baseline             | [16]      | 0.57 (0.09)   | [20]      | 0.55 (0.10)   | [25]      | 0.58 (0.10)   | [36]    | 0.56 (0.15)   | Mean Difference (SE)                   | -0.01 (0.03)            | -0.02 (0.02)            | -0.02 (0.02)     |
| 6 Month              | [16]      | 0.57 (0.09)   | [20]      | 0.54 (0.08)   | [25]      | 0.58 (0.09)   | [36]    | 0.57 (0.12)   | ANCOVA adjusted for Baseline (p-value) | 0.626                   | 0.236                   | 0.520            |
| Delta                | [16]      | -0.00 (0.09)  | [20]      | -0.00 (0.07)  | [25]      | -0.01 (0.08)  | [36]    | 0.01 (0.08)   | 95% Confidence Interval                | -0.068 to 0.040         | -0.057 to 0.024         | -0.059 to 0.022  |
| Within group p-value | 0.990     |               | 0.837     |               | 0.742     |               | 0.319   |               |                                        |                         |                         |                  |
|                      |           |               |           |               |           |               |         |               | MSC + CPC vs. CPCs Only                | MSC + CPC vs. MSCs Only | MSCs Only vs. CPCs Only |                  |
|                      |           |               |           |               |           |               |         |               | Mean Difference (SE)                   | 0.00 (0.03)             | 0.00 (0.03)             | 0.00 (0.02)      |
|                      |           |               |           |               |           |               |         |               | ANCOVA adjusted for Baseline (p-value) | 0.986                   | 0.590                   | 0.538            |
|                      |           |               |           |               |           |               |         |               | 95% Confidence Interval                | -0.051 to 0.061         | -0.053 to 0.059         | -0.045 to 0.041  |

| <b>Morphology</b>            |                  |                  |                  |                  |                  |                  |                |                  |                                               |                                |                                |                 |
|------------------------------|------------------|------------------|------------------|------------------|------------------|------------------|----------------|------------------|-----------------------------------------------|--------------------------------|--------------------------------|-----------------|
| <b>Scar Size Percent (%)</b> |                  |                  |                  |                  |                  |                  |                |                  |                                               |                                |                                |                 |
|                              | <b>MSC + CPC</b> |                  | <b>MSCs only</b> |                  | <b>CPCs only</b> |                  | <b>Placebo</b> |                  | <b>MSC + CPC vs. Placebo</b>                  | <b>MSCs Only vs. Placebo</b>   | <b>CPCs Only vs. Placebo</b>   |                 |
|                              | <b>[N]</b>       | <b>MEAN (SD)</b> | <b>[N]</b>       | <b>MEAN (SD)</b> | <b>[N]</b>       | <b>MEAN (SD)</b> | <b>[N]</b>     | <b>MEAN (SD)</b> |                                               |                                |                                |                 |
| <b>Baseline</b>              | [15]             | 17.45 (6.73)     | [16]             | 18.51 (4.52)     | [21]             | 19.80 (4.81)     | [31]           | 21.06 (5.98)     | <b>Mean Difference (SE)</b>                   | 0.21 (1.02)                    | -0.47 (0.75)                   | -0.42 (0.68)    |
| <b>6 Month</b>               | [15]             | 17.07 (6.88)     | [16]             | 17.44 (4.86)     | [21]             | 18.79 (4.89)     | [31]           | 20.46 (5.53)     | <b>ANCOVA adjusted for Baseline (p-value)</b> | 0.748                          | 0.268                          | 0.369           |
| <b>Delta</b>                 | [15]             | -0.39 (3.63)     | [16]             | -1.07 (2.51)     | [21]             | -1.01 (2.51)     | [31]           | -0.60 (2.29)     | <b>95% Confidence Interval</b>                | -1.927 to 2.351                | -2.009 to 1.061                | -1.799 to 0.968 |
| <b>Within group p-value</b>  |                  | 0.686            |                  | 0.107            |                  | 0.079            |                | 0.156            |                                               |                                |                                |                 |
|                              |                  |                  |                  |                  |                  |                  |                |                  | <b>MSC + CPC vs. CPCs Only</b>                | <b>MSC + CPC vs. MSCs Only</b> | <b>MSCs Only vs. CPCs Only</b> |                 |
|                              |                  |                  |                  |                  |                  |                  |                |                  | <b>Mean Difference (SE)</b>                   | 0.63 (1.09)                    | 0.69 (1.13)                    | 0.06 (0.83)     |
|                              |                  |                  |                  |                  |                  |                  |                |                  | <b>ANCOVA adjusted for Baseline (p-value)</b> | 0.742                          | 0.613                          | 0.823           |
|                              |                  |                  |                  |                  |                  |                  |                |                  | <b>95% Confidence Interval</b>                | -1.618 to 2.872                | -1.638 to 3.01                 | -1.635 to 1.753 |
| <b>Scar Tissue Mass (g)</b>  |                  |                  |                  |                  |                  |                  |                |                  |                                               |                                |                                |                 |
|                              | <b>MSC + CPC</b> |                  | <b>MSCs only</b> |                  | <b>CPCs only</b> |                  | <b>Placebo</b> |                  | <b>MSC + CPC vs. Placebo</b>                  | <b>MSCs Only vs. Placebo</b>   | <b>CPCs Only vs. Placebo</b>   |                 |
|                              | <b>[N]</b>       | <b>MEAN (SD)</b> | <b>[N]</b>       | <b>MEAN (SD)</b> | <b>[N]</b>       | <b>MEAN (SD)</b> | <b>[N]</b>     | <b>MEAN (SD)</b> |                                               |                                |                                |                 |
| <b>Baseline</b>              | [15]             | 28.51 (11.03)    | [16]             | 29.46 (9.62)     | [21]             | 34.50 (9.88)     | [31]           | 34.00 (11.55)    | <b>Mean Difference (SE)</b>                   | 0.74 (1.67)                    | -0.30 (1.04)                   | -1.25 (1.23)    |
| <b>6 Month</b>               | [15]             | 28.02 (11.70)    | [16]             | 27.94 (9.20)     | [21]             | 32.03 (9.05)     | [31]           | 32.77 (10.96)    | <b>ANCOVA adjusted for Baseline (p-value)</b> | 0.882                          | 0.484                          | 0.292           |
| <b>Delta</b>                 | [15]             | -0.48 (5.91)     | [16]             | -1.52 (3.19)     | [21]             | -2.47 (4.71)     | [31]           | -1.22 (3.74)     | <b>95% Confidence Interval</b>                | -2.740 to 4.222                | -2.415 to 1.815                | -3.738 to 1.238 |
| <b>Within group p-value</b>  |                  | 0.756            |                  | 0.075            |                  | 0.026            |                | 0.078            |                                               |                                |                                |                 |
|                              |                  |                  |                  |                  |                  |                  |                |                  | <b>MSC + CPC vs. CPCs Only</b>                | <b>MSC + CPC vs. MSCs Only</b> | <b>MSCs Only vs. CPCs Only</b> |                 |
|                              |                  |                  |                  |                  |                  |                  |                |                  | <b>Mean Difference (SE)</b>                   | 1.99 (1.84)                    | 1.04 (1.72)                    | -0.95 (1.30)    |
|                              |                  |                  |                  |                  |                  |                  |                |                  | <b>ANCOVA adjusted for Baseline (p-value)</b> | 0.529                          | 0.575                          | 0.899           |
|                              |                  |                  |                  |                  |                  |                  |                |                  | <b>95% Confidence Interval</b>                | -1.790 to 5.773                | -2.536 to 4.618                | -3.591 to 1.690 |

| <b>Functional Capacity</b>             |                  |                  |                  |                  |                  |                  |                |                  |                                               |                                |                                |                                |
|----------------------------------------|------------------|------------------|------------------|------------------|------------------|------------------|----------------|------------------|-----------------------------------------------|--------------------------------|--------------------------------|--------------------------------|
| <b>Peak V0<sub>2</sub> (ml/kg/min)</b> |                  |                  |                  |                  |                  |                  |                |                  |                                               |                                |                                |                                |
|                                        | <b>MSC + CPC</b> |                  | <b>MSCs only</b> |                  | <b>CPCs only</b> |                  | <b>Placebo</b> |                  |                                               | <b>MSC + CPC vs. Placebo</b>   | <b>MSCs Only vs. Placebo</b>   | <b>CPCs Only vs. Placebo</b>   |
|                                        | <b>[N]</b>       | <b>MEAN (SD)</b> | <b>[N]</b>       | <b>MEAN (SD)</b> | <b>[N]</b>       | <b>MEAN (SD)</b> | <b>[N]</b>     | <b>MEAN (SD)</b> |                                               |                                |                                |                                |
| <b>Baseline</b>                        | [17]             | 16.98 (5.14)     | [18]             | 16.74 (5.38)     | [26]             | 16.76 (4.86)     | [38]           | 16.17 (4.47)     | <b>Mean Difference (SE)</b>                   | -0.51 (0.92)                   | 0.29 (0.96)                    | 1.02 (0.72)                    |
| <b>6 Month</b>                         | [17]             | 16.04 (3.93)     | [18]             | 16.60 (3.90)     | [26]             | 17.34 (5.84)     | [38]           | 15.74 (4.68)     | <b>ANCOVA adjusted for Baseline (p-value)</b> | 0.689                          | 0.577                          | 0.146                          |
| <b>Delta</b>                           | [17]             | -0.95 (3.36)     | [18]             | -0.14 (3.65)     | [26]             | 0.58 (2.95)      | [38]           | -0.44 (2.68)     | <b>95% Confidence Interval</b>                | -2.409 to 1.389                | -1.689 to 2.274                | -0.436 to 2.471                |
| <b>Within group p-value</b>            | 0.262            |                  | 0.869            |                  | 0.325            |                  | 0.321          |                  |                                               |                                |                                |                                |
|                                        |                  |                  |                  |                  |                  |                  |                |                  |                                               | <b>MSC + CPC vs. CPCs Only</b> | <b>MSC + CPC vs. MSCs Only</b> | <b>MSCs Only vs. CPCs Only</b> |
|                                        |                  |                  |                  |                  |                  |                  |                |                  | <b>Mean Difference (SE)</b>                   | -1.53 (1.00)                   | -0.80 (1.18)                   | 0.73 (1.04)                    |
|                                        |                  |                  |                  |                  |                  |                  |                |                  | <b>ANCOVA adjusted for Baseline (p-value)</b> | 0.125                          | 0.444                          | 0.454                          |
|                                        |                  |                  |                  |                  |                  |                  |                |                  | <b>95% Confidence Interval</b>                | -3.565 to 0.509                | -3.213 to 1.608                | -1.389 to 2.839                |
| <b>Exercise Tolerance - 6 MWT (m)</b>  |                  |                  |                  |                  |                  |                  |                |                  |                                               |                                |                                |                                |
|                                        | <b>MSC + CPC</b> |                  | <b>MSCs only</b> |                  | <b>CPCs only</b> |                  | <b>Placebo</b> |                  |                                               | <b>MSC + CPC vs. Placebo</b>   | <b>MSCs Only vs. Placebo</b>   | <b>CPCs Only vs. Placebo</b>   |
|                                        | <b>[N]</b>       | <b>MEAN (SD)</b> | <b>[N]</b>       | <b>MEAN (SD)</b> | <b>[N]</b>       | <b>MEAN (SD)</b> | <b>[N]</b>     | <b>MEAN (SD)</b> |                                               |                                |                                |                                |
| <b>Baseline</b>                        | [18]             | 363.36 (87.52)   | [19]             | 354.21 (76.49)   | [26]             | 395.15 (77.56)   | [39]           | 367.92 (97.49)   | <b>Mean Difference (SE)</b>                   | 18.57 (20.54)                  | 17.88 (16.59)                  | -6.75 (14.29)                  |
| <b>6 Month</b>                         | [18]             | 390.39 (99.75)   | [19]             | 380.55 (85.53)   | [26]             | 396.87 (83.37)   | [39]           | 376.38 (105.60)  | <b>ANCOVA adjusted for Baseline (p-value)</b> | 0.374                          | 0.385                          | 0.860                          |
| <b>Delta</b>                           | [18]             | 27.03 (73.09)    | [19]             | 26.34 (53.45)    | [26]             | 1.71 (45.36)     | [39]           | 8.46 (69.84)     | <b>95% Confidence Interval</b>                | -23.279 to 60.412              | -15.533 to 51.295              | -35.304 to 21.804              |
| <b>Within group p-value</b>            | 0.135            |                  | 0.046            |                  | 0.849            |                  | 0.454          |                  |                                               |                                |                                |                                |
|                                        |                  |                  |                  |                  |                  |                  |                |                  |                                               | <b>MSC + CPC vs. CPCs Only</b> | <b>MSC + CPC vs. MSCs Only</b> | <b>MSCs Only vs. CPCs Only</b> |
|                                        |                  |                  |                  |                  |                  |                  |                |                  | <b>Mean Difference (SE)</b>                   | 25.32 (19.39)                  | 0.69 (21.15)                   | -24.63 (15.15)                 |
|                                        |                  |                  |                  |                  |                  |                  |                |                  | <b>ANCOVA adjusted for Baseline (p-value)</b> | 0.256                          | 0.917                          | 0.189                          |
|                                        |                  |                  |                  |                  |                  |                  |                |                  | <b>95% Confidence Interval</b>                | -14.536 to 65.169              | -42.437 to 43.809              | -55.384 to 6.123               |

| Functional Capacity  |           |                   |           |                 |           |                  |         |                   |                                        |                         |                         |                   |
|----------------------|-----------|-------------------|-----------|-----------------|-----------|------------------|---------|-------------------|----------------------------------------|-------------------------|-------------------------|-------------------|
| MLHFQ Summary Score  |           |                   |           |                 |           |                  |         |                   |                                        |                         |                         |                   |
|                      | MSC + CPC |                   | MSCs only |                 | CPCs only |                  | Placebo |                   | MSC + CPC vs. Placebo                  | MSCs Only vs. Placebo   | CPCs Only vs. Placebo   |                   |
|                      | [N]       | MEAN (SD)         | [N]       | MEAN (SD)       | [N]       | MEAN (SD)        | [N]     | MEAN (SD)         |                                        |                         |                         |                   |
| Baseline             | [19]      | 38.01 (24.40)     | [19]      | 55.45 (22.67)   | [26]      | 32.00 (23.44)    | [40]    | 39.00 (24.16)     | Mean Difference (SE)                   | -9.65 (4.80)            | -15.45 (5.84)           | -1.19 (5.68)      |
| 6 Month              | [19]      | 20.85 (16.35)     | [19]      | 32.49 (20.45)   | [26]      | 23.31 (19.66)    | [40]    | 31.50 (21.65)     | ANCOVA adjusted for Baseline (p-value) | 0.020                   | 0.122                   | 0.284             |
| Delta                | [19]      | -17.16 (16.06)    | [19]      | -22.95 (21.60)  | [26]      | -8.69 (24.33)    | [40]    | -7.50 (19.50)     | 95% Confidence Interval                | -19.346 to 0.038        | -27.333 to -3.569       | -12.633 to 10.246 |
| Within group p-value | 0.000     |                   | 0.000     |                 | 0.080     |                  | 0.020   |                   |                                        |                         |                         |                   |
|                      |           |                   |           |                 |           |                  |         |                   | MSC + CPC vs. CPCs Only                | MSC + CPC vs. MSCs Only | MSCs Only vs. CPCs Only |                   |
|                      |           |                   |           |                 |           |                  |         |                   | Mean Difference (SE)                   | -8.46 (6.03)            | 5.80 (6.18)             | 14.26 (6.88)      |
|                      |           |                   |           |                 |           |                  |         |                   | ANCOVA adjusted for Baseline (p-value) | 0.321                   | 0.535                   | 0.933             |
|                      |           |                   |           |                 |           |                  |         |                   | 95% Confidence Interval                | -20.621 to 3.699        | -6.762 to 18.357        | 0.369 to 28.147   |
| Biomarkers           |           |                   |           |                 |           |                  |         |                   |                                        |                         |                         |                   |
| NT-proBNP (pg/ml)*   |           |                   |           |                 |           |                  |         |                   |                                        |                         |                         |                   |
|                      | MSC + CPC |                   | MSCs only |                 | CPCs only |                  | Placebo |                   | MSC + CPC vs. Placebo                  | MSCs Only vs. Placebo   | CPCs Only vs. Placebo   |                   |
|                      | [N]       | MEAN (SD)         | [N]       | MEAN (SD)       | [N]       | MEAN (SD)        | [N]     | MEAN (SD)         |                                        |                         |                         |                   |
| Baseline             | [19]      | 1929.85 (5865.01) | [17]      | 469.36 (708.36) | [26]      | 781.48 (825.76)  | [39]    | 675.61 (1154.85)  | Mean Difference (SE)                   | -1683.0 (1167.2)        | -452.7 (316.9)          | -341.2 (289.1)    |
| 6 Month              | [19]      | 765.64 (978.04)   | [17]      | 535.38 (666.28) | [26]      | 959.03 (1074.76) | [39]    | 1194.37 (1998.41) | ANCOVA adjusted for Baseline (p-value) | 0.138                   | 0.181                   | 0.989             |
| Delta                | [19]      | -724.46 (4949.82) | [17]      | 66.02 (683.98)  | [26]      | 177.55 (526.72)  | [39]    | 518.76 (1686.29)  | 95% Confidence Interval                | -4117.3 to 751.3        | -1088.1 to 182.7        | -922.4 to 240.0   |
| Within group p-value | 0.999     |                   | 0.372     |                 | 0.019     |                  | 0.007   |                   |                                        |                         |                         |                   |
|                      |           |                   |           |                 |           |                  |         |                   | MSC + CPC vs. CPCs Only                | MSC + CPC vs. MSCs Only | MSCs Only vs. CPCs Only |                   |
|                      |           |                   |           |                 |           |                  |         |                   | Mean Difference (SE)                   | -1341.8 (1140.3)        | -1230.2 (1147.6)        | 111.5 (195.4)     |
|                      |           |                   |           |                 |           |                  |         |                   | ANCOVA adjusted for Baseline (p-value) | 0.065                   | 0.808                   | 0.067             |
|                      |           |                   |           |                 |           |                  |         |                   | 95% Confidence Interval                | -3734.5 to 1051.0       | -3634.2 to 1173.8       | -288.7 to 511.8   |

\*Log transformation for NT-proBNP; p-values were obtained from transformed data. Data presented as [N] Mean (SD), unless otherwise indicated

ANCOVA model adjusted for baseline value of outcome

MSC=mesenchymal stromal cells, CPC=c-kit positive cardiac cells, LVEF=left ventricular ejection fraction, LVEDVI=left ventricular end diastolic volume index, LVESVI=left ventricular end systolic volume index, MLHFQ=Minnesota Living with Heart Failure Questionnaire, NT-proBNP= N-Terminal pro-Brain Natriuretic Peptide

**Supplemental Table 11. Endpoint Analysis for Baseline to 12 Month (As Treated)**

| <b>Function</b>                          |                  |                  |                  |                  |                  |                  |                |                  |                                               |                                |                                |                 |
|------------------------------------------|------------------|------------------|------------------|------------------|------------------|------------------|----------------|------------------|-----------------------------------------------|--------------------------------|--------------------------------|-----------------|
| <b>LVEF (%)</b>                          |                  |                  |                  |                  |                  |                  |                |                  |                                               |                                |                                |                 |
|                                          | <b>MSC + CPC</b> |                  | <b>MSCs only</b> |                  | <b>CPCs only</b> |                  | <b>Placebo</b> |                  | <b>MSC + CPC vs. Placebo</b>                  | <b>MSCs Only vs. Placebo</b>   | <b>CPCs Only vs. Placebo</b>   |                 |
|                                          | <b>[N]</b>       | <b>MEAN (SD)</b> | <b>[N]</b>       | <b>MEAN (SD)</b> | <b>[N]</b>       | <b>MEAN (SD)</b> | <b>[N]</b>     | <b>MEAN (SD)</b> |                                               |                                |                                |                 |
| <b>Baseline</b>                          | [18]             | 29.86 (6.26)     | [17]             | 30.17 (6.72)     | [24]             | 26.38 (5.65)     | [31]           | 29.46 (6.12)     | <b>Mean Difference (SE)</b>                   | 0.99 (1.04)                    | 1.51 (2.05)                    | 1.39 (1.02)     |
| <b>12 Month</b>                          | [18]             | 30.48 (6.64)     | [17]             | 31.31 (7.91)     | [24]             | 27.40 (5.84)     | [31]           | 29.10 (5.40)     | <b>ANCOVA adjusted for Baseline (p-value)</b> | 0.271                          | 0.249                          | 0.506           |
| <b>Delta</b>                             | [18]             | 0.62 (3.61)      | [17]             | 1.14 (8.08)      | [24]             | 1.02 (4.06)      | [31]           | -0.37 (3.32)     | <b>95% Confidence Interval</b>                | -1.126 to 3.102                | -2.775 to 5.797                | -0.663 to 3.451 |
| <b>Within group p-value</b>              |                  | 0.477            |                  | 0.568            |                  | 0.229            |                | 0.540            |                                               |                                |                                |                 |
|                                          |                  |                  |                  |                  |                  |                  |                |                  | <b>MSC + CPC vs. CPCs Only</b>                | <b>MSC + CPC vs. MSCs Only</b> | <b>MSCs Only vs. CPCs Only</b> |                 |
|                                          |                  |                  |                  |                  |                  |                  |                |                  | <b>Mean Difference (SE)</b>                   | -0.41 (1.19)                   | -0.52 (2.14)                   | -0.12 (2.13)    |
|                                          |                  |                  |                  |                  |                  |                  |                |                  | <b>ANCOVA adjusted for Baseline (p-value)</b> | 0.889                          | 0.758                          | 0.418           |
|                                          |                  |                  |                  |                  |                  |                  |                |                  | <b>95% Confidence Interval</b>                | -2.809 to 1.997                | -4.954 to 3.909                | -4.531 to 4.297 |
| <b>Global Circumferential Strain (%)</b> |                  |                  |                  |                  |                  |                  |                |                  |                                               |                                |                                |                 |
|                                          | <b>MSC + CPC</b> |                  | <b>MSCs only</b> |                  | <b>CPCs only</b> |                  | <b>Placebo</b> |                  | <b>MSC + CPC vs. Placebo</b>                  | <b>MSCs Only vs. Placebo</b>   | <b>CPCs Only vs. Placebo</b>   |                 |
|                                          | <b>[N]</b>       | <b>MEAN (SD)</b> | <b>[N]</b>       | <b>MEAN (SD)</b> | <b>[N]</b>       | <b>MEAN (SD)</b> | <b>[N]</b>     | <b>MEAN (SD)</b> |                                               |                                |                                |                 |
| <b>Baseline</b>                          | [16]             | -9.16 (2.58)     | [14]             | -9.10 (2.52)     | [22]             | -7.81 (2.73)     | [28]           | -8.94 (3.48)     | <b>Mean Difference (SE)</b>                   | 0.09 (0.78)                    | -0.94 (0.91)                   | -1.19 (0.85)    |
| <b>12 Month</b>                          | [16]             | -8.32 (3.06)     | [14]             | -9.29 (3.29)     | [22]             | -8.25 (2.50)     | [28]           | -8.19 (2.93)     | <b>ANCOVA adjusted for Baseline (p-value)</b> | 0.992                          | 0.240                          | 0.453           |
| <b>Delta</b>                             | [16]             | 0.84 (2.03)      | [14]             | -0.19 (2.54)     | [22]             | -0.44 (2.83)     | [28]           | 0.75 (3.16)      | <b>95% Confidence Interval</b>                | -1.491 to 1.675                | -2.781 to 0.908                | -2.898 to 0.521 |
| <b>Within group p-value</b>              |                  | 0.118            |                  | 0.785            |                  | 0.473            |                | 0.222            |                                               |                                |                                |                 |
|                                          |                  |                  |                  |                  |                  |                  |                |                  | <b>MSC + CPC vs. CPCs Only</b>                | <b>MSC + CPC vs. MSCs Only</b> | <b>MSCs Only vs. CPCs Only</b> |                 |
|                                          |                  |                  |                  |                  |                  |                  |                |                  | <b>Mean Difference (SE)</b>                   | 1.28 (0.79)                    | 1.03 (0.85)                    | -0.25 (0.91)    |
|                                          |                  |                  |                  |                  |                  |                  |                |                  | <b>ANCOVA adjusted for Baseline (p-value)</b> | 0.367                          | 0.236                          | 0.699           |
|                                          |                  |                  |                  |                  |                  |                  |                |                  | <b>95% Confidence Interval</b>                | -0.319 to 2.881                | -0.719 to 2.777                | -2.109 to 1.605 |



| Function                |           |                |           |                |           |                |         |                |                                        |                         |                         |                  |
|-------------------------|-----------|----------------|-----------|----------------|-----------|----------------|---------|----------------|----------------------------------------|-------------------------|-------------------------|------------------|
| Longitudinal Strain (%) |           |                |           |                |           |                |         |                |                                        |                         |                         |                  |
|                         | MSC + CPC |                | MSCs only |                | CPCs only |                | Placebo |                | MSC + CPC vs. Placebo                  | MSCs Only vs. Placebo   | CPCs Only vs. Placebo   |                  |
|                         | [N]       | MEAN (SD)      | [N]       | MEAN (SD)      | [N]       | MEAN (SD)      | [N]     | MEAN (SD)      |                                        |                         |                         |                  |
| Baseline                | [16]      | -10.98 (2.77)  | [15]      | -10.27 (2.25)  | [22]      | -8.92 (2.86)   | [29]    | -9.70 (2.52)   | Mean Difference (SE)                   | 1.53 (0.97)             | 0.97 (0.84)             | -0.03 (0.89)     |
| 12 Month                | [16]      | -10.36 (2.89)  | [15]      | -10.20 (3.05)  | [22]      | -9.85 (2.73)   | [29]    | -10.61 (3.09)  | ANCOVA adjusted for Baseline (p-value) | 0.333                   | 0.383                   | 0.592            |
| Delta                   | [16]      | 0.62 (3.20)    | [15]      | 0.06 (2.47)    | [22]      | -0.94 (3.29)   | [29]    | -0.91 (2.98)   | 95% Confidence Interval                | -0.456 to 3.519         | -0.744 to 2.691         | -1.830 to 1.776  |
| Within group p-value    |           | 0.449          |           | 0.922          |           | 0.197          |         | 0.111          |                                        |                         |                         |                  |
|                         |           |                |           |                |           |                |         |                | MSC + CPC vs. CPCs Only                | MSC + CPC vs. MSCs Only | MSCs Only vs. CPCs Only |                  |
|                         |           |                |           |                |           |                |         |                | Mean Difference (SE)                   | 1.56 (1.06)             | 0.56 (1.02)             | -1.00 (0.95)     |
|                         |           |                |           |                |           |                |         |                | ANCOVA adjusted for Baseline (p-value) | 0.862                   | 0.815                   | 0.788            |
|                         |           |                |           |                |           |                |         |                | 95% Confidence Interval                | -0.607 to 3.724         | -1.538 to 2.654         | -2.928 to 0.927  |
| Structure               |           |                |           |                |           |                |         |                |                                        |                         |                         |                  |
| LVEDVI (mL/m2)          |           |                |           |                |           |                |         |                |                                        |                         |                         |                  |
|                         | MSC + CPC |                | MSCs only |                | CPCs only |                | Placebo |                | MSC + CPC vs. Placebo                  | MSCs Only vs. Placebo   | CPCs Only vs. Placebo   |                  |
|                         | [N]       | MEAN (SD)      | [N]       | MEAN (SD)      | [N]       | MEAN (SD)      | [N]     | MEAN (SD)      |                                        |                         |                         |                  |
| Baseline                | [18]      | 129.17 (27.81) | [17]      | 114.13 (27.20) | [24]      | 128.97 (30.16) | [31]    | 129.28 (30.96) | Mean Difference (SE)                   | -0.99 (5.53)            | 1.04 (4.76)             | 3.09 (4.42)      |
| 12 Month                | [18]      | 130.53 (31.92) | [17]      | 117.52 (29.49) | [24]      | 134.41 (32.01) | [31]    | 131.63 (30.22) | ANCOVA adjusted for Baseline (p-value) | 0.854                   | 0.788                   | 0.501            |
| Delta                   | [18]      | 1.36 (18.43)   | [17]      | 3.39 (13.66)   | [24]      | 5.44 (13.74)   | [31]    | 2.35 (19.04)   | 95% Confidence Interval                | -12.195 to 10.22        | -8.567 to 10.644        | -5.780 to 11.966 |
| Within group p-value    |           | 0.758          |           | 0.322          |           | 0.065          |         | 0.497          |                                        |                         |                         |                  |
|                         |           |                |           |                |           |                |         |                | MSC + CPC vs. CPCs Only                | MSC + CPC vs. MSCs Only | MSCs Only vs. CPCs Only |                  |
|                         |           |                |           |                |           |                |         |                | Mean Difference (SE)                   | -4.08 (5.17)            | -2.03 (5.46)            | 2.05 (4.34)      |
|                         |           |                |           |                |           |                |         |                | ANCOVA adjusted for Baseline (p-value) | 0.421                   | 0.828                   | 0.563            |
|                         |           |                |           |                |           |                |         |                | 95% Confidence Interval                | -14.639 to 6.478        | -13.165 to 9.114        | -6.761 to 10.871 |

| Structure                   |           |               |           |               |           |               |         |               |                                        |                         |                         |                 |
|-----------------------------|-----------|---------------|-----------|---------------|-----------|---------------|---------|---------------|----------------------------------------|-------------------------|-------------------------|-----------------|
| LVESVI (mL/m <sup>2</sup> ) |           |               |           |               |           |               |         |               |                                        |                         |                         |                 |
|                             | MSC + CPC |               | MSCs only |               | CPCs only |               | Placebo |               | MSC + CPC vs. Placebo                  | MSCs Only vs. Placebo   | CPCs Only vs. Placebo   |                 |
|                             | [N]       | MEAN (SD)     | [N]       | MEAN (SD)     | [N]       | MEAN (SD)     | [N]     | MEAN (SD)     |                                        |                         |                         |                 |
| Baseline                    | [18]      | 91.55 (25.43) | [17]      | 80.63 (24.80) | [24]      | 95.91 (27.66) | [31]    | 92.29 (28.14) | Mean Difference (SE)                   | -1.48 (4.24)            | -0.89 (3.96)            | 1.08 (3.79)     |
| 12 Month                    | [18]      | 91.79 (28.07) | [17]      | 81.46 (25.18) | [24]      | 98.71 (29.84) | [31]    | 94.00 (26.05) | ANCOVA adjusted for Baseline (p-value) | 0.705                   | 0.469                   | 0.679           |
| Delta                       | [18]      | 0.24 (13.85)  | [17]      | 0.83 (11.92)  | [24]      | 2.79 (13.02)  | [31]    | 1.71 (15.03)  | 95% Confidence Interval                | -10.052 to 7.097        | -8.882 to 7.109         | -6.523 to 8.680 |
| Within group p-value        | 0.943     |               | 0.779     |               | 0.305     |               | 0.531   |               |                                        |                         |                         |                 |
|                             |           |               |           |               |           |               |         |               | MSC + CPC vs. CPCs Only                | MSC + CPC vs. MSCs Only | MSCs Only vs. CPCs Only |                 |
|                             |           |               |           |               |           |               |         |               | Mean Difference (SE)                   | -2.56 (4.21)            | -0.59 (4.36)            | 1.97 (3.93)     |
|                             |           |               |           |               |           |               |         |               | ANCOVA adjusted for Baseline (p-value) | 0.527                   | 0.973                   | 0.507           |
|                             |           |               |           |               |           |               |         |               | 95% Confidence Interval                | -11.098 to 5.986        | -9.465 to 8.284         | -5.997 to 9.927 |
| Sphericity (ml)             |           |               |           |               |           |               |         |               |                                        |                         |                         |                 |
|                             | MSC + CPC |               | MSCs only |               | CPCs only |               | Placebo |               | MSC + CPC vs. Placebo                  | MSCs Only vs. Placebo   | CPCs Only vs. Placebo   |                 |
|                             | [N]       | MEAN (SD)     | [N]       | MEAN (SD)     | [N]       | MEAN (SD)     | [N]     | MEAN (SD)     |                                        |                         |                         |                 |
| Baseline                    | [17]      | 0.56 (0.10)   | [17]      | 0.53 (0.09)   | [24]      | 0.58 (0.10)   | [31]    | 0.55 (0.10)   | Mean Difference (SE)                   | 0.01 (0.02)             | 0.00 (0.03)             | 0.00 (0.02)     |
| 12 Month                    | [17]      | 0.57 (0.12)   | [17]      | 0.54 (0.09)   | [24]      | 0.59 (0.10)   | [31]    | 0.56 (0.09)   | ANCOVA adjusted for Baseline (p-value) | 0.686                   | 0.776                   | 0.583           |
| Delta                       | [17]      | 0.01 (0.07)   | [17]      | 0.01 (0.09)   | [24]      | 0.01 (0.08)   | [31]    | 0.01 (0.08)   | 95% Confidence Interval                | -0.040 to 0.052         | -0.050 to 0.055         | -0.043 to 0.044 |
| Within group p-value        | 0.514     |               | 0.686     |               | 0.698     |               | 0.694   |               |                                        |                         |                         |                 |
|                             |           |               |           |               |           |               |         |               | MSC + CPC vs. CPCs Only                | MSC + CPC vs. MSCs Only | MSCs Only vs. CPCs Only |                 |
|                             |           |               |           |               |           |               |         |               | Mean Difference (SE)                   | 0.01 (0.02)             | 0.00 (0.03)             | 0.00 (0.03)     |
|                             |           |               |           |               |           |               |         |               | ANCOVA adjusted for Baseline (p-value) | 0.942                   | 0.687                   | 0.554           |
|                             |           |               |           |               |           |               |         |               | 95% Confidence Interval                | -0.043 to 0.054         | -0.053 to 0.059         | -0.057 to 0.052 |

| <b>Morphology</b>            |                  |                  |                  |                  |                  |                  |                |                  |                                               |                                |                                |                 |
|------------------------------|------------------|------------------|------------------|------------------|------------------|------------------|----------------|------------------|-----------------------------------------------|--------------------------------|--------------------------------|-----------------|
| <b>Scar Size Percent (%)</b> |                  |                  |                  |                  |                  |                  |                |                  |                                               |                                |                                |                 |
|                              | <b>MSC + CPC</b> |                  | <b>MSCs only</b> |                  | <b>CPCs only</b> |                  | <b>Placebo</b> |                  | <b>MSC + CPC vs. Placebo</b>                  | <b>MSCs Only vs. Placebo</b>   | <b>CPCs Only vs. Placebo</b>   |                 |
|                              | <b>[N]</b>       | <b>MEAN (SD)</b> | <b>[N]</b>       | <b>MEAN (SD)</b> | <b>[N]</b>       | <b>MEAN (SD)</b> | <b>[N]</b>     | <b>MEAN (SD)</b> |                                               |                                |                                |                 |
| <b>Baseline</b>              | [14]             | 17.15 (6.87)     | [13]             | 18.99 (4.26)     | [19]             | 20.03 (5.34)     | [26]           | 21.36 (6.12)     | <b>Mean Difference (SE)</b>                   | -0.47 (1.13)                   | -0.01 (0.75)                   | 0.03 (0.89)     |
| <b>12 Month</b>              | [14]             | 16.13 (6.04)     | [13]             | 18.43 (5.22)     | [19]             | 19.51 (6.18)     | [26]           | 20.81 (5.85)     | <b>ANCOVA adjusted for Baseline (p-value)</b> | 0.216                          | 0.806                          | 0.917           |
| <b>Delta</b>                 | [14]             | -1.02 (3.77)     | [13]             | -0.56 (1.95)     | [19]             | -0.52 (3.12)     | [26]           | -0.55 (2.67)     | <b>95% Confidence Interval</b>                | -2.838 to 1.892                | -1.544 to 1.522                | -1.773 to 1.830 |
| <b>Within group p-value</b>  | 0.328            |                  | 0.320            |                  | 0.476            |                  | 0.303          |                  |                                               |                                |                                |                 |
|                              |                  |                  |                  |                  |                  |                  |                |                  | <b>MSC + CPC vs. CPCs Only</b>                | <b>MSC + CPC vs. MSCs Only</b> | <b>MSCs Only vs. CPCs Only</b> |                 |
|                              |                  |                  |                  |                  |                  |                  |                |                  | <b>Mean Difference (SE)</b>                   | -0.50 (1.24)                   | -0.46 (1.14)                   | 0.04 (0.90)     |
|                              |                  |                  |                  |                  |                  |                  |                |                  | <b>ANCOVA adjusted for Baseline (p-value)</b> | 0.455                          | 0.522                          | 0.996           |
|                              |                  |                  |                  |                  |                  |                  |                |                  | <b>95% Confidence Interval</b>                | -3.047 to 2.044                | -2.847 to 1.923                | -1.795 to 1.873 |
| <b>Scar Tissue Mass (g)</b>  |                  |                  |                  |                  |                  |                  |                |                  |                                               |                                |                                |                 |
|                              | <b>MSC + CPC</b> |                  | <b>MSCs only</b> |                  | <b>CPCs only</b> |                  | <b>Placebo</b> |                  | <b>MSC + CPC vs. Placebo</b>                  | <b>MSCs Only vs. Placebo</b>   | <b>CPCs Only vs. Placebo</b>   |                 |
|                              | <b>[N]</b>       | <b>MEAN (SD)</b> | <b>[N]</b>       | <b>MEAN (SD)</b> | <b>[N]</b>       | <b>MEAN (SD)</b> | <b>[N]</b>     | <b>MEAN (SD)</b> |                                               |                                |                                |                 |
| <b>Baseline</b>              | [14]             | 28.65 (11.43)    | [13]             | 29.88 (8.45)     | [19]             | 34.75 (10.29)    | [26]           | 33.52 (11.75)    | <b>Mean Difference (SE)</b>                   | -0.40 (1.87)                   | 0.02 (1.27)                    | -0.47 (1.67)    |
| <b>12 Month</b>              | [14]             | 27.49 (11.09)    | [13]             | 29.14 (9.29)     | [19]             | 33.52 (12.17)    | [26]           | 32.76 (11.21)    | <b>ANCOVA adjusted for Baseline (p-value)</b> | 0.528                          | 0.832                          | 0.812           |
| <b>Delta</b>                 | [14]             | -1.16 (6.21)     | [13]             | -0.74 (3.33)     | [19]             | -1.23 (6.21)     | [26]           | -0.77 (4.43)     | <b>95% Confidence Interval</b>                | -4.300 to 3.509                | -2.565 to 2.61                 | -3.869 to 2.938 |
| <b>Within group p-value</b>  | 0.497            |                  | 0.437            |                  | 0.399            |                  | 0.387          |                  |                                               |                                |                                |                 |
|                              |                  |                  |                  |                  |                  |                  |                |                  | <b>MSC + CPC vs. CPCs Only</b>                | <b>MSC + CPC vs. MSCs Only</b> | <b>MSCs Only vs. CPCs Only</b> |                 |
|                              |                  |                  |                  |                  |                  |                  |                |                  | <b>Mean Difference (SE)</b>                   | 0.07 (2.19)                    | -0.42 (1.90)                   | -0.49 (1.70)    |
|                              |                  |                  |                  |                  |                  |                  |                |                  | <b>ANCOVA adjusted for Baseline (p-value)</b> | 0.869                          | 0.778                          | 0.769           |
|                              |                  |                  |                  |                  |                  |                  |                |                  | <b>95% Confidence Interval</b>                | -4.409 to 4.548                | -4.379 to 3.542                | -3.962 to 2.985 |

| Functional Capacity              |           |                |           |                |           |                |         |                 |                                        |                         |                         |                   |
|----------------------------------|-----------|----------------|-----------|----------------|-----------|----------------|---------|-----------------|----------------------------------------|-------------------------|-------------------------|-------------------|
| Peak V0 <sub>2</sub> (ml/kg/min) |           |                |           |                |           |                |         |                 |                                        |                         |                         |                   |
|                                  | MSC + CPC |                | MSCs only |                | CPCs only |                | Placebo |                 | MSC + CPC vs. Placebo                  | MSCs Only vs. Placebo   | CPCs Only vs. Placebo   |                   |
|                                  | [N]       | MEAN (SD)      | [N]       | MEAN (SD)      | [N]       | MEAN (SD)      | [N]     | MEAN (SD)       |                                        |                         |                         |                   |
| Baseline                         | [18]      | 17.12 (5.02)   | [18]      | 16.69 (5.36)   | [23]      | 17.02 (4.70)   | [31]    | 16.72 (4.71)    | Mean Difference (SE)                   | -0.87 (1.00)            | 1.38 (0.75)             | 0.48 (0.81)       |
| 12 Month                         | [18]      | 15.80 (5.11)   | [18]      | 17.63 (4.83)   | [23]      | 17.05 (6.15)   | [31]    | 16.27 (4.64)    | ANCOVA adjusted for Baseline (p-value) | 0.374                   | 0.064                   | 0.536             |
| Delta                            | [18]      | -1.32 (3.75)   | [18]      | 0.93 (2.49)    | [23]      | 0.03 (3.14)    | [31]    | -0.45 (2.65)    | 95% Confidence Interval                | -2.931 to 1.191         | -0.147 to 2.910         | -1.151 to 2.117   |
| Within group p-value             | 0.155     |                | 0.130     |                | 0.958     |                | 0.354   |                 |                                        |                         |                         |                   |
|                                  |           |                |           |                |           |                |         |                 | MSC + CPC vs. CPCs Only                | MSC + CPC vs. MSCs Only | MSCs Only vs. CPCs Only |                   |
|                                  |           |                |           |                |           |                |         |                 | Mean Difference (SE)                   | -1.35 (1.10)            | -2.25 (1.06)            | -0.90 (0.88)      |
|                                  |           |                |           |                |           |                |         |                 | ANCOVA adjusted for Baseline (p-value) | 0.223                   | 0.039                   | 0.339             |
|                                  |           |                |           |                |           |                |         |                 | 95% Confidence Interval                | -3.593 to 0.887         | -4.420 to -0.083        | -2.677 to 0.88    |
| Exercise Tolerance - 6 MWT (m)   |           |                |           |                |           |                |         |                 |                                        |                         |                         |                   |
|                                  | MSC + CPC |                | MSCs only |                | CPCs only |                | Placebo |                 | MSC + CPC vs. Placebo                  | MSCs Only vs. Placebo   | CPCs Only vs. Placebo   |                   |
|                                  | [N]       | MEAN (SD)      | [N]       | MEAN (SD)      | [N]       | MEAN (SD)      | [N]     | MEAN (SD)       |                                        |                         |                         |                   |
| Baseline                         | [18]      | 363.36 (87.52) | [17]      | 362.53 (74.52) | [24]      | 400.52 (78.37) | [32]    | 372.66 (104.19) | Mean Difference (SE)                   | 10.62 (20.30)           | 16.41 (17.10)           | 1.56 (15.89)      |
| 12 Month                         | [18]      | 385.78 (96.02) | [17]      | 390.74 (79.90) | [24]      | 413.88 (87.70) | [32]    | 384.45 (111.25) | ANCOVA adjusted for Baseline (p-value) | 0.623                   | 0.384                   | 0.774             |
| Delta                            | [18]      | 22.42 (73.76)  | [17]      | 28.21 (55.73)  | [24]      | 13.35 (58.48)  | [32]    | 11.80 (59.28)   | 95% Confidence Interval                | -30.871 to 52.111       | -18.330 to 51.148       | -30.349 to 33.464 |
| Within group p-value             | 0.215     |                | 0.053     |                | 0.275     |                | 0.269   |                 |                                        |                         |                         |                   |
|                                  |           |                |           |                |           |                |         |                 | MSC + CPC vs. CPCs Only                | MSC + CPC vs. MSCs Only | MSCs Only vs. CPCs Only |                   |
|                                  |           |                |           |                |           |                |         |                 | Mean Difference (SE)                   | 9.06 (21.09)            | -5.79 (22.02)           | -14.85 (18.03)    |
|                                  |           |                |           |                |           |                |         |                 | ANCOVA adjusted for Baseline (p-value) | 0.938                   | 0.797                   | 0.656             |
|                                  |           |                |           |                |           |                |         |                 | 95% Confidence Interval                | -33.918 to 52.043       | -50.675 to 39.096       | -51.441 to 21.737 |

| Functional Capacity  |           |                 |           |                 |           |                 |         |                  |                                        |                         |                         |                   |
|----------------------|-----------|-----------------|-----------|-----------------|-----------|-----------------|---------|------------------|----------------------------------------|-------------------------|-------------------------|-------------------|
| MLHFQ Summary Score  |           |                 |           |                 |           |                 |         |                  |                                        |                         |                         |                   |
|                      | MSC + CPC |                 | MSCs only |                 | CPCs only |                 | Placebo |                  | MSC + CPC vs. Placebo                  | MSCs Only vs. Placebo   | CPCs Only vs. Placebo   |                   |
|                      | [N]       | MEAN (SD)       | [N]       | MEAN (SD)       | [N]       | MEAN (SD)       | [N]     | MEAN (SD)        |                                        |                         |                         |                   |
| Baseline             | [18]      | 37.67 (25.06)   | [18]      | 54.86 (23.81)   | [26]      | 31.16 (23.27)   | [36]    | 39.53 (24.88)    | Mean Difference (SE)                   | -7.49 (7.08)            | -18.65 (7.88)           | -0.85 (6.07)      |
| 12 Month             | [18]      | 24.73 (15.62)   | [18]      | 30.75 (20.17)   | [26]      | 24.85 (20.22)   | [36]    | 34.07 (19.48)    | ANCOVA adjusted for Baseline (p-value) | 0.082                   | 0.229                   | 0.182             |
| Delta                | [18]      | -12.95 (23.89)  | [18]      | -24.11 (28.04)  | [26]      | -6.31 (21.86)   | [36]    | -5.46 (25.77)    | 95% Confidence Interval                | -21.844 to 6.864        | -34.717 to -2.591       | -12.999 to 11.293 |
| Within group p-value | 0.034     |                 | 0.002     |                 | 0.154     |                 | 0.212   |                  |                                        |                         |                         |                   |
|                      |           |                 |           |                 |           |                 |         |                  | MSC + CPC vs. CPCs Only                | MSC + CPC vs. MSCs Only | MSCs Only vs. CPCs Only |                   |
|                      |           |                 |           |                 |           |                 |         |                  | Mean Difference (SE)                   | -6.64 (7.08)            | 11.16 (8.68)            | 17.80 (7.88)      |
|                      |           |                 |           |                 |           |                 |         |                  | ANCOVA adjusted for Baseline (p-value) | 0.645                   | 0.690                   | 0.788             |
|                      |           |                 |           |                 |           |                 |         |                  | 95% Confidence Interval                | -21.011 to 7.737        | -6.498 to 28.826        | 1.725 to 33.878   |
| Biomarkers           |           |                 |           |                 |           |                 |         |                  |                                        |                         |                         |                   |
| NT-proBNP (pg/ml)*   |           |                 |           |                 |           |                 |         |                  |                                        |                         |                         |                   |
|                      | MSC + CPC |                 | MSCs only |                 | CPCs only |                 | Placebo |                  | MSC + CPC vs. Placebo                  | MSCs Only vs. Placebo   | CPCs Only vs. Placebo   |                   |
|                      | [N]       | MEAN (SD)       | [N]       | MEAN (SD)       | [N]       | MEAN (SD)       | [N]     | MEAN (SD)        |                                        |                         |                         |                   |
| Baseline             | [18]      | 589.28 (517.76) | [17]      | 440.42 (711.60) | [24]      | 728.32 (771.74) | [34]    | 680.34 (1232.07) | Mean Difference (SE)                   | -223.6 (206.6)          | -106.8 (191.8)          | -189.0 (184.6)    |
| 12 Month             | [18]      | 648.92 (734.23) | [17]      | 616.88 (827.02) | [24]      | 822.56 (762.36) | [34]    | 963.58 (1814.75) | ANCOVA adjusted for Baseline (p-value) | 0.227                   | 0.895                   | 0.838             |
| Delta                | [18]      | 59.63 (613.43)  | [17]      | 176.46 (505.35) | [24]      | 92.25 (543.76)  | [34]    | 283.24 (860.10)  | 95% Confidence Interval                | -639.5 to 192.3         | -492.5 to 278.9         | -558.9 to 180.9   |
| Within group p-value | 0.963     |                 | 0.175     |                 | 0.234     |                 | 0.057   |                  |                                        |                         |                         |                   |
|                      |           |                 |           |                 |           |                 |         |                  | MSC + CPC vs. CPCs Only                | MSC + CPC vs. MSCs Only | MSCs Only vs. CPCs Only |                   |
|                      |           |                 |           |                 |           |                 |         |                  | Mean Difference (SE)                   | -34.61 (182.3)          | -116.8 (189.5)          | -82.22 (165.4)    |
|                      |           |                 |           |                 |           |                 |         |                  | ANCOVA adjusted for Baseline (p-value) | 0.297                   | 0.320                   | 0.574             |
|                      |           |                 |           |                 |           |                 |         |                  | 95% Confidence Interval                | -405.0 to 335.8         | -502.7 to 269.1         | -417.5 to 253.1   |

\*Log transformation for NT-proBNP; p-values were obtained from transformed data. Data presented as [N] Mean (SD), unless otherwise indicated

ANCOVA model adjusted for baseline value of outcome

MSC=mesenchymal stromal cells, CPC=c-kit positive cardiac cells, LVEF=left ventricular ejection fraction, LVEDVI=left ventricular end diastolic volume index, LVESVI=left ventricular end systolic volume index, MLHFQ=Minnesota Living with Heart Failure Questionnaire, NT-proBNP= N-Terminal pro-Brain Natriuretic Peptide
